1 **Dual DNA/RNA-binding factor regulates dynamics of hnRNP splicing condensates**

2

3 Mukulika Ray\*, Julia Zaborowsky\*, Pranav Mahableshwarkar, Smriti Vaidyanathan, Jasmine  
4 Shum, Renjith Viswanathan, Annie Huang, Szu-Huan Wang, Victoria Johnson, Noah Wake,  
5 Ashley M. Conard, Alexander E. Conicella, Ryan Puterbaugh, Nicolas L. Fawzi<sup>†</sup> and Erica  
6 Larschan<sup>†</sup>

7

8 \* Co-First Authors

9 <sup>†</sup>Co-Corresponding authors

10

11

12 **Abstract (70 words)**

13

14 Despite decades of research, mechanisms by which co-transcriptional alternative splicing events  
15 are targeted to the correct genomic locations to drive cell fate decisions remain unknown. By  
16 combining structural and molecular approaches, we define a new mechanism by which an  
17 essential transcription factor (TF) targets co-transcriptional splicing through physical and  
18 functional interaction with RNA and RNA binding proteins (RBPs). We show that an essential  
19 TF co-transcriptionally regulates sex-specific alternative splicing by directly interacting with a  
20 subset of target RNAs on chromatin and modulating the dynamics of hnRNPA2 homolog nuclear  
21 splicing condensates.

22

23

24 **Main text (1500 words)**

25

26 Mechanisms to drive precise alternative splicing at thousands of genomic loci, which establish  
27 sex and cell type-specific transcriptome diversity, remain important targets for biological  
28 understanding because they establish sex and cell type-specific transcriptome diversity.  
29 Chromatin-bound transcription factors (TFs) and RNA binding proteins (RBPs) co-  
30 transcriptionally regulate alternative splicing<sup>1-4</sup>. However, the mechanisms by which TFs and  
31 RBPs coordinate transcription and alternative splicing at specific genomic locations in a

32 particular cell type to drive specific alternative splicing events remain poorly understood. Most  
33 TFs bind DNA and RNA<sup>5-7</sup> and interact with diverse RBPs<sup>8,9</sup>. Nevertheless, the mechanisms by  
34 which interactions between TFs, RNA, and RBPs generate the specific alternatively spliced  
35 transcripts essential for developmental decisions remain unknown. We hypothesize that TFs are  
36 critical to targeting the correct co-transcriptional splicing events to specific genomic locations  
37 due to their unique ability to bind chromatin, RNA, and spliceosomal RBPs.

38  
39 We test this hypothesis by defining the role of GA-binding TF CLAMP (chromatin-linked  
40 adapter for MSL Proteins) in targeting sex-specific splicing to the correct genomic locations on  
41 chromatin in *Drosophila*. CLAMP has several properties that suggest that it could target sex-  
42 specific alternative splicing events to chromatin: 1) CLAMP binds to specific GA-enriched DNA  
43 motifs via its mapped DNA binding domain, and its binding sites differ in males and females<sup>10-</sup>  
44 <sup>13</sup>; 2) CLAMP is a pioneer TF that regulates sex-specific splicing in embryos at genes where it  
45 does not regulate transcription<sup>14</sup>; 3) CLAMP is enriched at the intronic region of CLAMP-  
46 dependent sex-specifically spliced genes<sup>11,14</sup>; 4) CLAMP is associated with RBPs that are  
47 spliceosome components<sup>9</sup>.

48  
49 Here, we define direct CLAMP-RNA interactions and compare them to CLAMP-DNA  
50 interactions to identify associations between TF-DNA and TF-RNA binding at genes where  
51 CLAMP regulates sex-specific alternative splicing. Furthermore, we determine how CLAMP  
52 affects the dynamics of RBPs, which are known to regulate alternative splicing as part of nuclear  
53 splicing condensates.

54  
55 To define RNA species that interact with CLAMP in different cellular compartments at high  
56 resolution, we performed fractionation iCLIP (individual-nucleotide resolution CrossLinking  
57 and ImmunoPrecipitation) to identify CLAMP RNA targets in chromatin (ChF) and  
58 nucleoplasmic (NF) fractions of male (S2) and female (Kc) *Drosophila* cell lines, S2 well  
59 established cell lines for studying sex-specific processes such as dosage compensation<sup>15,16</sup>.

60  
61 Most CLAMP interaction with RNA occurs on chromatin with unique sex-specific targets (Fig  
62 1A, Table 1a). Interestingly, CLAMP also directly interacts with spliceosomal RNAs sex-

63 specifically (Fig 1B). In the male chromatin fraction, CLAMP interacts with the catalytic step 2  
64 spliceosome consisting of U2, U5, and U6 snRNAs (FDR:1.7E-3). In contrast, the female  
65 chromatin fraction is enriched for transcripts that encode proteins that bind to the U1-U2  
66 snRNAs (FDR:1.1E-2), suggesting that CLAMP regulates splicing differently in males and  
67 females.

68  
69 Next, we asked how the CLAMP interaction with DNA correlates with its interaction with RNA  
70 on chromatin. Therefore, we plotted the frequency of identifying a CLAMP RNA binding peak  
71 on chromatin over a region  $\pm 1$  kb from the closest CLAMP DNA binding peak to define the  
72 following categories: a) complete overlap of RNA peaks with DNA peaks; b) partial overlap of  
73 RNA peak with the ends of a DNA peak; and c) RNA peaks nearby ( $\pm 1$  kb) DNA peaks (Fig 1C,  
74 Fig S1a-c). We found that most overlapping CLAMP RNA peaks are within 250 bp of the  
75 middle of the nearest CLAMP DNA peak in both male and female cells (Fig 1C), suggesting that  
76 CLAMP links RNA to DNA during co-transcriptional splicing at a subset of its target genes (Fig  
77 1D- E; Table 1b).

78  
79 Next, we combined *in vivo* and *in vitro* approaches to define how CLAMP regulates alternative  
80 splicing through interaction with RNA and RBPs. CLAMP does not have a canonical RNA  
81 recognition motif (**RRM**) but contains a prion-like domain (PrLD), a subclass of intrinsically  
82 disordered domains (IDR) that are enriched in polar residues and found in yeast prion proteins  
83 (Fig 1F-H). Many RBPs and TFs contain PrLD domains<sup>17,18</sup> that can promote RNA-binding and  
84 drive the formation of phase-separated biomolecular condensates<sup>19</sup>. PrLD domains in TFs  
85 promote co-aggregation with RBPs to regulate transcription<sup>20-22</sup>. However, mechanisms by  
86 which the PrLD domains in TFs regulate alternative splicing remained unknown.

87  
88 We define the role of CLAMP PrLD by generating complete (CLAMP  $\Delta 154-290$ a.a) and partial  
89 (CLAMP  $\Delta 160-290$ a.a) PrLD deleted mutant fly lines using CRISPR/Cas9 genomic mutagenesis  
90 and homologous repair<sup>39</sup>. Complete deletion of the PrLD (CLAMP<sup>delPrLD</sup>) results in embryonic  
91 lethality. In contrast, partial deletion (*clamp*<sup>delPrLD+6Q</sup>) mutants that retain a stretch of 6  
92 glutamines survive, suggesting that these glutamines (aa154-160) are essential for viability (Fig  
93 1H). Therefore, we assayed sex-specific alternative splicing in trans-heterozygous mutants

94 (*clamp*<sup>delPrLD</sup>/*clamp*<sup>delPrLD+6Q</sup>) to assure viability until it is possible to define the sex of animals at  
95 the larval stage. Analysis of RNA sequencing data using the time2splice pipeline (Ray, Conard,  
96 et al., 2023) from trans-heterozygous mutants (*clamp*<sup>delPrLD</sup>/*clamp*<sup>delPrLD+6Q</sup>) identifies CLAMP  
97 PrLD-dependent female (Table 2a) and male-specific splicing (Table 2b). Therefore, the  
98 CLAMP PrLD is essential for viability and impacts sex-specific alternative splicing.

99  
100 Next, we asked whether the PrLD domain regulates the CLAMP-RNA interaction using NMR  
101 and RNA-Protein EMSAs (Electrophoretic Mobility Shift Assays). Both assays demonstrated  
102 that the PrLD domain in CLAMP promotes the interaction of CLAMP with RNA (Fig 1I-J).  
103 Using NMR spectroscopy to probe a mixture of total yeast RNA extract and the isolated CLAMP  
104 PrLD, we find that CLAMP PrLD directly interacts with RNA (Fig 1I). CLAMP is associated  
105 with the Male Sex-lethal Complex (MSL), which regulates dosage compensation in males and  
106 contains the *roX* long non-coding RNAs<sup>12,23</sup>. However, it was not known whether CLAMP  
107 directly interacts with the *roX* RNAs. Because the *roX* RNAs have a defined structure and  
108 function<sup>24</sup>, we used *roX2*, identified by iCLIP as an *in vivo* male-specific CLAMP interactor  
109 (Table 1a), to determine whether CLAMP directly interacts with RNA *in vitro*. Therefore, we  
110 used a *roX2* probe (411 nt) for RNA-Protein EMSA gel shift assays with full-length CLAMP<sup>WT</sup>  
111 and CLAMP<sup>delPrLD</sup> proteins that were expressed and purified from *E. coli*. At the same protein  
112 and RNA concentrations, the CLAMP<sup>delPrLD</sup> protein binds to RNA less efficiently than  
113 CLAMP<sup>WT</sup> (Fig 1J). Furthermore, iCLIP data indicate that CLAMP binds to the *roX2* RNA  
114 adjacent (12nt downstream) to a stem-loop region (Fig S2), which is essential for *roX2*  
115 interaction with RNA helicase A, a component of both the MSL complex and the spliceosome<sup>24</sup>.  
116 Therefore, we hypothesized that the *roX2* stem loop promotes interaction with CLAMP. To test  
117 this hypothesis, we also designed and tested the following *roX2* mutant probes: a) a full-length  
118 probe lacking the stem-loop and CLAMP binding region (69nt), which reduced CLAMP binding  
119 to the *roX2* RNA (Fig S2, Fig 1K), and b) a full-length probe lacking only the *in vivo* CLAMP  
120 binding region (25nt) but not the stem loop, which did not qualitatively affect CLAMP binding  
121 to the *roX2* RNA *in vitro* (Fig S2, Fig 1L). Therefore, the presence of the *roX2* RNA stem-loop  
122 and the CLAMP PrLD domain increased the ability of CLAMP to interact with RNA.

123

124 To determine whether the CLAMP PrLD domain regulates sex-specific alternative splicing of  
125 RNAs that are directly bound by CLAMP (Table 2a, b), we compared the RNAs bound to  
126 CLAMP *in vivo* identified by iCLIP (Table 1a) in cell lines with CLAMP PrLD-dependent sex-  
127 specifically spliced genes in L3 larvae (Table 2a, b). We determined that 14 CLAMP PrLD-  
128 dependent sex-specifically spliced genes are direct CLAMP RNA interactors, identifying a  
129 smaller subset of key genes for further analysis (Table 3). Moreover, most of these 14 direct  
130 targets are themselves regulators of alternative splicing (Table 3). Therefore, it is possible that  
131 CLAMP, which is heavily maternally deposited<sup>25</sup> and regulates 60% of all sex-specific spliced  
132 isoforms, functions as an essential upstream splicing regulator by directly regulating the splicing  
133 of splicing factors, which then regulates alternative splicing of additional target genes.

134  
135 To define how CLAMP regulates sex-specific splicing beyond directly interacting with the RNA  
136 of target genes, we determined how CLAMP regulates the splicing and dynamics of one of its  
137 essential target genes and interactors, the hnRNPA2B1 orthologue, *hrp38*. One of the 14  
138 CLAMP PrLD-dependent spliced genes that is a direct CLAMP RNA target is the *hrp38*  
139 transcript (Table 2a, 3). Furthermore, we previously demonstrated using proteomics that CLAMP  
140 sex-specifically interacts with the Hrp38 protein that regulates alternative splicing<sup>9,26</sup>.

141  
142 Due to the functional interaction between CLAMP and Hrp38 at both the RNA and protein  
143 levels, we further defined how CLAMP regulates both the sex-specific splicing of the *hrp38*  
144 transcript and the sex-specific dynamics of Hrp38 which is a component of highly mobile  
145 nuclear splicing speckles which regulate alternative splicing<sup>27-30</sup>. First, we defined how CLAMP  
146 interacts with *hrp38* RNA using RNA EMSA. Integrating iCLIP with alternative splicing  
147 analysis suggested that CLAMP binds to exon1 of the *hrp38* transcript in males, which  
148 undergoes splicing to remove exon2. In contrast, in CLAMP<sup>delPrLD</sup>/CLAMP<sup>delPrLD+6Q</sup> mutants, the  
149 *hrp38* transcript retains exon2 (Fig 2A, B). Therefore, we compared CLAMP<sup>WT</sup> binding to *hrp38*  
150 exon1 and exon2 probes using RNA EMSAs and found that at the same protein and RNA  
151 concentrations, CLAMP binds strongly to *hrp38* exon1 RNA with no unbound RNA remaining  
152 (Fig 2C). Furthermore, the PrLD domain of CLAMP is important for CLAMP-*hrp38* RNA  
153 binding (Fig 2D). Interestingly, CLAMP<sup>WT</sup> still binds to *hrp38* exon2 *in vitro* even though it does

154 not bind *in vivo*, suggesting that other RBPs modulate the specificity of CLAMP-RNA  
155 interactions *in vivo*.

156  
157 Next, we validated that the alternative splicing of the *hrp38* gene is sex-specifically regulated by  
158 the CLAMP PrLD domain *in vivo* during development at the third instar larval stage in males  
159 and females. We found that in *clamp*<sup>delPrLD</sup>/*clamp*<sup>delPrLD+6Q</sup> mutants, splicing of intron  
160 AF:r6:3R:28600568:28600718:+ between exon2 and exon4 (Fig 2B) is regulated by CLAMP as  
161 predicted by genome-wide splicing analysis (Table 2b). In both female and male mutants,  
162 splicing of intron AF:r6:3R:28600568:28600718:+ occurs. However, in males, splicing was more  
163 efficient than in females (Fig 2E, F). Our *in vivo* splicing analysis demonstrates that the CLAMP  
164 PrLD domain is important for *hrp38* RNA splicing during male and female development. PrLD  
165 domains can drive the phase separation of proteins<sup>19</sup> and promote the formation of subnuclear  
166 bio-condensates involved in transcription<sup>20,31</sup> and splicing<sup>19,32</sup>, therefore, we performed  
167 biochemical phase separation assays to determine how the CLAMP PrLD domain regulates the  
168 phase separation behavior of CLAMP (Fig 2G). We found that the CLAMP PrLD domain  
169 contributes to phase separation of the N-terminal half of CLAMP (residues 1-300), which is  
170 important because many RBPs involved in splicing form splicing condensates, and TFs form  
171 transcription condensates, which interact during co-transcriptional splicing<sup>33</sup>. Although the PrLD  
172 domains of TFs can promote co-aggregation with RBPs, current work does not yet explain how  
173 TF-RBP interaction regulates the dynamics of splicing condensates, which is known to regulate  
174 their function.

175  
176 Interestingly, one splicing component that is part of dynamic nuclear splicing condensates or  
177 speckles is Hrp38<sup>27-30</sup>, which is associated at three levels with CLAMP: 1) CLAMP interacts  
178 with *hrp38* RNA transcript (Table 1a); 2) CLAMP regulates alternative splicing of the *hrp38*  
179 transcript, and 3) CLAMP interacts with Hrp38 protein<sup>9</sup> (Fig. 1; Table 1a). Therefore, we  
180 hypothesized that CLAMP PrLD-mediated phase separation affects the phase separation  
181 properties of Hrp38 condensates. We tested our hypothesis by combining *in vitro* and *in vivo*  
182 approaches to measure condensate formation, stability, and dynamics. *In vitro*, CLAMP 1-  
183 300<sup>WT</sup> and Hrp38 co-phase-separate into liquid-like (Fig 2H). To complement *in vitro* studies,  
184 we analyzed the dynamics of Hrp38 nuclear speckles/condensates *in vivo* during development in

185 live tissues isolated from males and females. Therefore, we compared the dynamics of Hrp38-  
186 GFP nuclear speckles/condensates in the presence of CLAMP<sup>WT</sup> and CLAMP<sup>delPrLD</sup> proteins.  
187 FRAP analysis shows that in both *clamp*<sup>delPrLD/clamp</sup><sup>delPrLD+6Q</sup> mutant male and female  
188 individuals, Hrp38 remains in a more immobile phase compared with matched wild-type controls  
189 (Fig 2I). Next, we analyzed the trajectories of moving Hrp38 speckles over time to determine  
190 whether CLAMP regulates their mobility. When we analyze trajectories of moving Hrp38  
191 speckles over time, more restricted tracks denote more immobile fractions, while freely moving  
192 particles represent mobile fractions<sup>34</sup>. Interestingly, we found that even in wild-type controls,  
193 female Hrp38 speckles are more immobile than male Hrp38 speckles. Furthermore, in the  
194 absence of the CLAMP PrLD domain, Hrp38 speckles in males become more immobile (Fig 2J),  
195 becoming more female-like. Therefore, the CLAMP PrLD domain regulates the dynamics of  
196 Hrp38 speckles sex-specifically in live tissues, promoting their enhanced mobility in males.

197  
198 Prior studies<sup>35-38</sup> suggest that larger aggregates of hnRNPs are more immobile and have  
199 decreased function. In CLAMP<sup>delPrLD</sup> mutants, we observe bigger Hrp38 speckle size (Fig 2K)  
200 and loss of mobility (Fig 2I, J). We thus conclude that the CLAMP PrLD domain regulates  
201 Hrp38 splicing condensate size and, therefore, is likely to modulate the ability of Hrp38  
202 condensates to regulate alternative splicing. Furthermore, the PrLD domain in CLAMP promotes  
203 CLAMP liquid droplet formation (Fig 2G), which co-localizes with Hrp38 splicing condensates  
204 (Fig 2H). Hence CLAMP PrLD may help maintain Hrp38's dynamic properties, preventing them  
205 from forming large non-functional aggregates. Therefore, our data support a model in which sex-  
206 specific differences in alternative splicing arise from differential TF-RBP and TF-RNA  
207 interactions (Fig. 1). How the sex-specific differential interactions are established requires future  
208 investigation.

209  
210 Thus, we show for the first time that an intrinsically disordered domain (IDR) in a TF regulates  
211 alternative splicing by regulating the dynamics of splicing condensates. Also, our data suggest  
212 that TFs that bind to specific DNA motifs and have RNA binding properties are the best  
213 candidates for understanding how specific alternative splicing events are regulated in specific  
214 cellular contexts.

215

216  
217  
218  
219  
220  
221  
222  
223  
224  
225  
226  
227  
228  
229  
230  
231  
232  
233  
234  
235  
236  
237  
238  
239  
240  
241  
242  
243  
244  
245  
246

## Methods:

**Cell culture:** Kc and S2 cells were maintained at 25°C in Schneider's media supplemented with 10% Fetal Bovine Serum and 1.4X Antibiotic-Antimycotic (ThermoFisher Scientific, USA). Cells were passaged every three days to maintain an appropriate cell density.

**Fly strains and husbandry:** *Drosophila melanogaster* fly stocks were maintained at 24°C on standard corn flour sucrose media. Fly strains with complete (CLAMP Δ154-290a.a) and partial (CLAMP Δ160-290a.a) PrLD deleted mutant fly lines using CRISPR/Cas9 genomic mutagenesis and homologous repair<sup>39</sup>. We used the flyCRISPR Optimal Target Finder tool from the University of Wisconsin to design a CRISPR target sequence for *clamp*<sup>delPrLD</sup> and *clamp*<sup>delPrLD+6Q39</sup>. We cloned target sequence oligonucleotides (one gRNA) for *clamp*<sup>delPrLD</sup> (sense:5'CTTCGGGTACAACGCCAAAGCGAG3';antisense:3'CCCATGTTGCGGTTTCGCTC-CAAA5') and two gRNAs for *clamp*<sup>delPrLD+6Q</sup> (sense: 5'CTTCG-AATAGAATCGCCGCCGCT3';antisense:3'CTTATCTTAGCGGCGGGCGACAAA5')and(sense:5'CTTC-GTTGTGGCTGCACAGACTGG3';antisense:3'CAACACCGACGTGTCTGACC-CAA5') into the pU6-BbsI-chiRNA plasmid (Addgene no. 45946), following the protocol outlined on the flyCRISPR website. We validated the correct ligation of the *clamp* CRISPR target sequence into the pU6-BbsI-chiRNA plasmid by Sanger sequencing using universal M13 primers. For homologous repair, we used ssODN15'ACATAAGCTTTAAGTGTGACGTATGTTTCAGATATGTTCCCTCATTGTCAC TTCTTAATGCTCATAGAGAGGCGAGCAGTGGGTCTGGCCATCATCCTGTGAAAAAAC GAAATTCCCAGCAGATGACCAAAT3' for *clamp*<sup>delPrLD</sup> and ssODN2 5'CTTCTTAATGCTCATAAGCGGATGCATACAGACGGGGAACAGCAGCAACAACAGC AACATAACGCCCAAGCTGGCGGTACAACGCCAAAGCGAGAGGCGAGCAGTGGGTCT GGCCATCATCCTGTGAAAAAA3' for *clamp*<sup>delPrLD+6Q</sup>. The commercial service, BestGene



247 Inc., microinjected the validated pU6-BbsI-chiRNA plasmid containing the *clamp* target  
248 sequence into germline-expressing Cas9 flies Bloomington stock #51324. Flies containing a  
249 single mutation were returned balanced over the *Curly of Oster (CyO)* second chromosome  
250 balancer. From these progenies, we identified the CRISPR/Cas9-generated mutations by PCR  
251 across the target region (forward:5'-GATATGTTCCCTCATTTGGCAC-3', reverse:5'-  
252 CACTCCCATGCTTCACACAG-3'). We isolated two independent clamp alleles from this  
253 validation: (1)  $y^1, w^{1118}; clamp^{delPrLD}/CyO$ ; and (2)  $y^1, w^{1118}; clamp^{delPrLD+6Q}/CyO$ . These were  
254 crossed to obtain male and female  $clamp^{delPrLD+6Q}/clamp^{delPrLD}$  genotypes. Crisper/Cas9  
255 generated fly mutants and fly strain  $y^1 w^{1118}; P\{w[+mC] =PTT-GC\} Hrb98DE[ZCL0588]$   
256 expressing Hrp38GFP (Bloomington #6822) were crossed obtained  
257  $clamp^{delPrLD+6Q}/clamp^{delPrLD}$  male and female expressing GFP tagged Hrp38 protein.

258

259 **CUT&RUN in cell lines:** Cells were allowed to grow to confluency and harvested. An equal  
260 number of cells for each category were suspended in wash buffer and subjected to Cut&Run  
261 assay according to Skene et al. 2018<sup>40</sup> using rabbit anti-CLAMP (5 $\mu$ g) to immunoprecipitate  
262 CLAMP bound DNA fragments from male (S2) and female (Kc) cell lines. Three replicates for  
263 males and females were run, but one female sample was dropped during later stages due to  
264 insufficient starting material. Rabbit IgG was used as a control for each male and female cell line  
265 sample. 1ng CUT&RUN DNA was used to generate libraries using the Kapa Hyper prep kit  
266 (Roche, USA) and SeqCapAdapter Kit A (Roche, USA). 14 PCR cycles were used to amplify the  
267 libraries. AMPure XP beads (Beckman Coulter, USA) were used for library purification, and  
268 fragment analysis was performed to check the library quality. Paired-end 2x25 bp Illumina Hi-  
269 seq sequencing was performed.

270

271 **RNA-seq in third instar larvae (L3):** Total RNA was extracted from control ( $y^1 w^{1118};$   
272  $hrp38GFP$ ) and *clamp* mutant ( $yw, clamp^{delPrLD+6Q}/clamp^{delPrLD}; hrp38GFP$ ) male and female  
273 third instar larvae (3 each) using Trizol (Invitrogen, USA). Four replicates were in each category  
274 prepared. Messenger RNA was purified from total RNA using poly-Toligo-attached magnetic  
275 beads. After fragmentation, the first strand of cDNA was synthesized using random hexamer  
276 primers, followed by the second cDNA synthesis. The library was ready after end repair, A-  
277 tailing, adapter ligation, size selection, amplification, and purification, followed by paired-end

278 RNA-sequencing in Illumina Novaseq 6000. The sequencing data was run through a SUPPA-  
279 based time2splice pipeline<sup>14</sup> to identify CLAMP-dependent sex-specific splicing events. Data is  
280 to be submitted to the GEO repository.

281

282 **iCLIP:** Cells were allowed to grow to confluency, and UV crosslinked using 254 nm UV light in  
283 Stratalinker 2400 on ice (Stratagene, USA). UV-treated cells were lysed to get different cellular  
284 fractions (Cytoplasmic, Nucleoplasmic, and Chromatin) according to the Fr-iCLIP  
285 (fractionation-iCLIP) protocol from Brugiolo et al 2017<sup>42</sup>. Chromatin and nucleoplasmic  
286 fractions were sonicated with a Branson digital sonicator at 30% amplitude for 30 seconds (10  
287 sec on and 20 sec off) to disrupt DNA before IP. All three fractions were separately centrifuged  
288 at 20,000 xg for 5 min at 4°C. Fractions were tested by Western blotting using RNAPolII for  
289 Chromatin Fraction and Actin for Cytoplasmic Fraction. Protein quantification for each fraction  
290 was done using the manufacturer's protocol for Pierce 660 nm protein assay reagent (Thermo  
291 Scientific, USA). Each Fraction was subjected to iCLIP protocol as described in Huppertz et al.  
292 2014<sup>41</sup> using rabbit-CLAMP antibody to immunoprecipitate bound RNAs extracted using  
293 proteinase K and phenol: chloroform. Custom cDNA libraries prepared according to Huppertz et  
294 al. 2014<sup>41</sup> using distinct primers Rt1clip-Rt16clip for separate samples containing individual 4nt-  
295 barcode sequences that allow multiplexing of samples. cDNA libraries for each sample were  
296 amplified separately using 31 cycles of PCR, mixed later, and sequenced using standard Illumina  
297 protocols. Heyl et al. 2020<sup>42</sup> methods using the Galaxy CLIP-Explorer were followed to  
298 preprocess, perform quality control, post-process, and peak calling.

299

300

### 301 **Fluorescence recovery after photobleaching (FRAP):**

302 *In vivo* (Malpighian tubule principle cell nucleus expressing Hrp38GFP in control and  
303 *clamp*<sup>delPrLD+6Q</sup>/*clamp*<sup>delPrLD</sup> male and female third instar larvae) FRAP was performed on a  
304 Nikon Spin-disc Confocal Microscope with a 488 nm laser on a 60× objective taking frames  
305 without delay (short time course and fast-recovering control) with 3-sec acquisition pre-  
306 bleaching, bleaching using 473 nm laser at 100% and 2 minutes acquisition post-bleach.  
307 Malpighian tubules (MTs) were dissected in Grace's Insect media with 1:50 dilution of  
308 ProlongLive (antifading agent). A 6% slurry of low melting agarose (A9414-5G) in Grace's

309 Insect media was used to stabilize the MTs during imaging on a bridge slide with a cavity to pour  
310 the agarose, which was allowed to solidify, forming a soft base to mount the tissue. The  
311 intensities recorded on selected regions of interest were obtained using NIS element software.  
312 Data fitting and immobile fraction analysis were obtained with NIS element software FRAP  
313 analysis module.

314

315 ***In-vivo live imaging:*** Salivary gland expressing Hrp38GFP (nuclear) in control and  
316 *clamp*<sup>delPrLD+6Q</sup>/*clamp*<sup>delPrLD</sup> male and female third instar larvae were dissected in Grace's Insect  
317 media with 1:50 dilution of ProlongLive (antifading agent) and mounted in the dissecting media  
318 on a bridge slide with low melting agarose (A9414-5G) in Grace's Insect media as a base.  
319 Moving Hrp38GFP condensates in the nucleus were imaged using a 488 nm laser on Nikon  
320 Spin-disc Confocal Microscope at 60X magnification for 2 minutes each without any delay in  
321 acquisition.

322

323 **Validation of hrp38 splicing using RT-PCR assay:** Total RNA was extracted from 5 third  
324 instar larvae (L3) female and male embryos expressing *clamp*<sup>delPrLD+6Q</sup>/*clamp*<sup>delPrLD</sup> and *y<sup>l</sup>, w<sup>1118</sup>*.  
325 Following the manufacturer's protocol, we reverse-transcribed one microgram of total RNA  
326 using the SuperScript VILO cDNA Synthesis Kit (Life Technologies, USA). We amplified target  
327 sequences by PCR using primers designed to span alternatively spliced junctions (FP-  
328 5'AGAACGGCAACTCCAATGGC3' and RP-5'GCCAGTCTCCTTGTCATGA3') and Quick  
329 load Taq 2X Master mix (#M0271L, NEB, USA) according to the manufacturer's protocol (28  
330 cycles). 10ul of PCR product of each replicate for each gene was loaded in separate wells in 2%  
331 agarose gels and imaged using a ChemiDoc™ MP Imaging system (BioRad, USA). All  
332 replicates for each gene were loaded on the same gel. The gel images were quantified using the  
333 densitometry steps with the Fiji image analysis tool. Student's t-tests were performed to  
334 determine significant differences between groups (two samples at a time). Three replicates for  
335 RT-PCR samples were performed.

336

337 **CLAMP Protein Expression and Purification: Vectors encoding Maltose binding protein**  
338 (MBP)-tagged CLAMP 1-300 and MBP-tagged CLAMP 1-300 delPrLD were produced by  
339 cloning into the pTHMT vector. Plasmids were transformed into BL21 cells and bacteria cultures

340 were grown in M9 minimal medium supplemented with  $^{15}\text{N}$  ammonium chloride. Cultures were  
341 grown at  $37^\circ\text{C}$  and 200 RPM to an optical density of 0.6-0.8 and subsequently induced with 1  
342 mM isopropyl- $\beta$ -D-1-thiogalactopyranoside (IPTG) for 4 hr at  $37^\circ\text{C}$ . Cell pellets were harvested  
343 by centrifugation at 6,000 RPM, resuspended in lysis buffer (20 mM Tris pH 8, 1 M NaCl, 10  
344 mM Imidazole, 1 mM DTT, and one EDTA-free protease inhibitor tablet (Roche) per liter of  
345 culture), and lysed by sonication. The lysed cell suspension was centrifuged at 20,000 RPM for  
346 50 min. The supernatant was filtered using a 0.2  $\mu\text{m}$  syringe filter, and loaded onto a HisTrap HP  
347 5 ml column. The HisTrap column was first washed with 20 mM Tris pH 8, 1 M NaCl, 10 mM  
348 Imidazole, 1 mM DTT Buffer, and then the bound protein was eluted with 20 mM Tris pH 8, 1  
349 M NaCl, 500 mM Imidazole, 1 mM DTT buffer. Fractions containing MBP-CLAMP 1-300 were  
350 collected and purified on a Superdex 200 (26/600) column equilibrated in 20 mM Tris pH 8, 1.0  
351 M NaCl buffer. CLAMP PrLD (154-290) was expressed and purified using Histrap HP as above.  
352 Following that (instead of size exclusion chromatography), CLAMP PrLD was collected from  
353 the Histrap HP, concentrated to 1 mL, and cleaved overnight with TEV protease to separate  
354 CLAMP PrLD from the MBP in 20 mM Tris pH 8, 1 M NaCl, 10 mM Imidazole, and 1 mM  
355 DTT Buffer. The cleaved protein was separated from the HisTag by a HisTrap subtraction with  
356 the same Tris buffer previously described. MBP-tagged Full-Length CLAMP was grown  
357 following the same methods above. Once the Full-Length CLAMP cell lysate supernatant was  
358 loaded onto HisTrap HP 5 ml column, the protein was eluted with a gradient from 10 to 500 mM  
359 imidazole in pH 5.5 20 mM MES and 361 mM  $\text{CaCl}_2$ . Fractions containing MBP-CLAMP FL  
360 were collected and purified on a Superdex 200 (26/600) column equilibrated in pH 5.5, 20mM  
361 MES, and 361mM  $\text{CaCl}_2$  buffer. For each CLAMP construct, fractions containing the desired  
362 protein were verified using SDS-PAGE, concentrated using a 10 kDa centrifugation filter  
363 (Millipore), aliquoted, and frozen.

364

365 **Hrp38 protein purification and phase separation assay:** Maltose binding protein (MBP)-  
366 tagged Hrp38 was expressed in BL21 *E. coli* cells. The cells were resuspended in 20 mM NaPi at  
367 pH 7.4 with 300 mM NaCl and 10 mM imidazole, and the lysate was cleared by centrifuging at  
368 20,000 rpm for 60 mins at  $4^\circ\text{C}$ . The supernatant was filtered using 0.2  $\mu\text{m}$  filters and loaded on  
369 a 5 ml Histrap HP column. The protein was eluted using an imidazole gradient of 10-300 mM  
370 over 5-column volumes. The protein fractions were pooled and loaded on a Superdex 200

371 (26/600) column for size exclusion. 20 mM NaPi with 300 mM NaCl at pH 7.4 was used for size  
372 exclusion chromatography and storage. Protein was flash frozen as aliquots of 1 mM.  
373 Fluorescent labeling of the CLAMP 1-300 and CLAMP 1-300 dPrLD was done using  
374 AlexaFluor 488 maleimide dye, while Hrp38 was labeled using 555 maleimide. The protein was  
375 diluted to 100  $\mu$ M in 20 mM Tris buffer at pH 7.4 with 50 mM NaCl, and a 5-fold concentration  
376 (500  $\mu$ M) of the dye dissolved in DMSO was added to 5% of the total volume. The reaction  
377 mixture was incubated for 1 hour, and then, unbound AlexaFluor was removed using 1 ml Zeba  
378 spin desalting columns. The proteins were concentrated to 1 mM, flash frozen, and stored. For  
379 phase separation assay and microscopy Hrp38 was buffer exchanged to 20 mM Tris buffer at pH  
380 7.4 with 50 mM NaCl to a final concentration of 20  $\mu$ M. We calculated all concentrations on  
381 NanoDrop by using the extinction coefficient 130,000  $M^{-1} cm^{-1}$  for Hrp38 and 78270 for MBP  
382 CLAMP 1-300 and MBP CLAMP 1-300 dPrLD. 1  $\mu$ M of AlexaFluor labeled CLAMP was  
383 added to Hrp38 and TEV protease was added to cleave the MBP tag. Less than 1% fluorescent  
384 protein was used in all samples. A Nikon spin-disc confocal microscope was used for imaging at  
385 20X magnification with 1.5X zoom. The images were processed using ImageJ.

386

387 **NMR Sample Preparation and Spectroscopy:**  $^{15}N$  Isotopically labeled samples of CLAMP 1-  
388 300 were prepared at 50  $\mu$ M in a buffer containing 20 mM MES pH 5.5, 100 mM NaCl, 1 mM  
389 DTT, and 5%  $D_2O$  and then moved into a 5 mm NMR tube using a glass pipette. CLAMP  
390 concentration was determined by measuring absorbance at 280 nm (and then dividing absorbance  
391 by the extinction coefficient estimated by the ExPASy ProtParam). NMR spectra were recorded  
392 on Bruker Avance 850 MHz  $^1H$  Larmor frequency spectrometer with HCN TCI z-gradient  
393 cryoprobes. A two-dimensional  $^1H^{15}N$  HSQC was acquired using spectral widths of 10.5 ppm  
394 and 30.0 ppm in the direct and indirect dimensions, with 3072 and 512 total points and  
395 acquisition time of 172 ms and 99.0 ms, respectively. Samples of isotopically labeled CLAMP  
396 PrLD were prepared at 20  $\mu$ M in a buffer containing 50 mM MES pH 5, and 5%  $D_2O$ . Because  
397 the PrLD domain of CLAMP contains no tyrosines or tryptophans, the  $A_{280}$  absorbance could not  
398 be measured to determine the protein concentration. Instead, sample concentration was estimated  
399 by measuring the absorbance at 230 nm, and calculating the extinction coefficient to be 300  $M^{-1}$   
400  $cm^{-1}$  per peptide bond (40.5  $mM^{-1}cm^{-1}$  for CLAMP PrLD). Torula yeast was added to one PrLD  
401 sample at a 1:1 Protein to RNA ratio by weight and NMR spectra were acquired in 5 mm NMR

402 tubes on a Bruker Avance 850 MHz <sup>1</sup>H Larmor frequency spectrometer. Both two-dimensional  
403 <sup>1</sup>H<sup>15</sup>N HSQC were acquired using spectral widths of 14.0 ppm and 25.0 ppm in the direct and  
404 indirect dimensions, with 2048 and 256 total points and acquisition time of 86.0 ms and 59.4 ms,  
405 respectively. All data was processed and analyzed using NMRPipe and CCPNMR Analysis 2.5  
406 software<sup>50,51</sup>.

407  
408 **RNA Electrophoretic Mobility Shift Assays:** *rox2*RNA probes at 100 nM and *hrp38* RNA  
409 probes at 50nM were incubated with MBP-tagged FL CLAMP<sup>WT</sup> protein or MBP-tagged FL  
410 CLAMP<sup>delPrLD</sup> protein in REMSA binding buffer provided with the LightShift Chemiluminescent  
411 RNA EMSA kit (Thermo Scientific, USA) at room temperature for 30 min according to  
412 manufacturer's protocol. Reactions were loaded onto 6% TBE retardation gels (Thermo Fisher  
413 Scientific) and run in 0.5× Tris–borate–EDTA buffer for one hour. RNA-Protein complex was  
414 transferred to the Nylon membrane using the iBlot transfer system (ThermoFisher Scientific),  
415 and the probe signal was detected using a Chemiluminescent Nucleic acid detection module  
416 (#80880, ThermoFisher Scientific).

417  
418

## 419 **Computational Methods**

420 **CUT&RUN Data analysis:** Sequenced reads were run through FASTQC<sup>43</sup>(fastqc  
421 replicate\_R1\_001.fastq.gz replicate\_R2\_001.fastq.gz) with default parameters to check the  
422 quality of raw sequence data and filter out any sequences flagged for poor quality. Sequences  
423 were trimmed and reassessed for quality using TrimGalore  
424 (<https://github.com/FelixKrueger/TrimGalore/issues/25>) and FastQC<sup>43</sup>, respectively. All Illumina  
425 lanes of the same flow cell. fastq files were merged, and sequenced reads were mapped to release  
426 6 *Drosophila melanogaster* genome (dm6). We compared Bowtie2<sup>44</sup>, HISAT2<sup>45</sup>, and BWA<sup>46</sup>.  
427 We found the best alignment quality with BWA and thus used this method's results downstream.  
428 Next, we performed conversion to bam and sorting (e.g., using: bowtie2 -x dm6\_genome -1  
429 replicate\_R1\_001.fastq.gz -2 replicate\_R2\_001.fastq.gz -S out.sam> stout.txt 2>  
430 alignment\_info.txt; samtools view -bSout.sam>out.bam; rm -rfout.sam; samtools sort out.bam -o  
431 out.sorted.bam). We removed reads (using samtools) with a MAPQ less than 30 and any reads  
432 with PCR duplicate reads (identified using MarkDuplicates Picard -2.20.2). Peaks identified

433 using MACS2<sup>47</sup>(macs2 callpeak -t out.sorted.bam -B -f BAM --nomodel --SPMR --keep-dup all  
434 -g dm --trackline -n outname --cutoff-analysis --call-summits -p 0.01 --outdiroutdir) and keep  
435 duplicates separate. To calculate fold-enrichment macs2 is rerun (macs2 bdgcmp -t \$treat -c  
436 \$control -o \$out.sorted.bam\_FE.bdg -m FE 2> \$ out.sorted.bam\_FE.log; macs2 bdgcmp -t \$treat  
437 -c \$control -o \$out.sorted.bam\_logLR.bdg -m logLR -p 0.00001 2). For motif analysis, the  
438 MEME<sup>48</sup> suite was used. Data was submitted to the GEO repository (#GSE174781,  
439 #GSE220981 and #GSE220053).

440  
441 **iCLIP Data analysis:** The method from Heyl et al. 2020<sup>42</sup> using the Galaxy CLIP-Explorer was  
442 followed to preprocess, perform quality control, post-process and perform peak calling. UMI  
443 tools were used for preprocessing, and then UMI tools and Cutadapt were used for Adapter,  
444 Barcode, and UMI removal. Cutadapt (Galaxy version 3.5) was used for filtering with a custom  
445 adaptersequenceAGATCGGAAGAGCGGTTCAGCAGGAATGCCGAGACCGATCTCGTAT  
446 GCCGTCTTCTGCTTG. All other settings followed the Heyl et al. 2020 Galaxy iCLIP-explorer  
447 workflow. UMI-Tools Extract (Galaxy Version 1.1.2+galaxy2) was then used with a barcode  
448 pattern of NNNXXXXNN. No unpaired reads were allowed. The barcode was on the 3' end. Je-  
449 Demultiplex (Galaxy Version 1.2.1) was then used for demultiplexing. FastQC was used for  
450 quality control. Mapping was done by RNA STAR (Galaxy version 2.5.2b-2) using dm6. All  
451 settings were chosen based on the existing parameters from the iCLIP-explorer settings. We  
452 selected FALSE for the option to use end-to-end read alignments with no soft-clipping. bedtools  
453 used for Read-Filtering, and UMI-Tools (Galaxy version 0.5.3.0) for de-duplication. PEAKachu  
454 was used for Peak Calling to generate bed files. The PEAKachu settings were followed using the  
455 Galaxy CLIP-explorer workflow. The maximum insert size was set to 150, the minimum cluster  
456 expression fraction was set to 0.01, the minimum block overlap was set to 0.5, and the minimum  
457 block expression was set to 0.1. The Mad Multiplier was set to 0.0, the Fold Change Threshold  
458 was set to 2.0, and the adjusted p-value threshold was set to 0.05. Peaks were annotated using  
459 RCAS<sup>49</sup> (RNA Centric Annotation System), an R package using Rstudio. MEME Suite is used  
460 for motif detection. RCAS was used for functional analysis of the transcriptomes isolated by  
461 iCLIP, such as transcript features. Data was submitted to the GEO repository (#GSE205987).  
462

463 **Integrating CUT&RUN and iCLIP data:** A Python script was created that iterates through all  
464 of the DNA peak bed files for CLAMP DNA binding sites in Kc and S2 cell lines (CUT&RUN  
465 data, #GSE220053) as a reference and tests for overlap with CLAMP-bound RNA peaks (each  
466 sequence is between 25-50bp in size) in the Kc and S2 (iCLIP data, (#GSE205987). The  
467 overlaps are categorized into four main categories based upon the location of the overlap: 1)  
468 completely overlapping (purple lines in frequency plot), 2) partially overlapping at the DNA  
469 peak start site (red lines in frequency plot); 3) partially overlapping at the DNA peak end site  
470 (blue lines in frequency plot) and 4) non-overlapping, i.e., when there is an overlap in a region  
471 outside the DNA binding site (yellow lines in frequency plot). This extended region is defined by  
472 the *scope* variable in the script, allowing the overlap to look for binding sites near the DNA  
473 binding site (this scope is 2 kb, including the DNA binding site). We note that multiple RNA  
474 peaks can be found on one DNA peak. These overlaps are placed onto a [-scope, scope] region.  
475 Then, each type of overlap shown with a different color is overlaid and plotted onto a frequency  
476 plot. So, if the frequency at a given base pair is 5, five overlaps contain that base pair within the  
477 region defined by the scope.

478  
479 **Analysis of Imaging data:** Live-image 2 minutes movies acquired through confocal microscopy  
480 were pre-processed using Fiji (ImageJ) Jython macro script, involving Fiji Plugins and built-in  
481 software on the Hrp38 condensate (green channel) to distinguish Hrp38 phase condensates from  
482 the cell background. Simple Ratio bleach correction was applied, and the minimum and  
483 maximum intensity adjustment was executed based on the mean intensity and standard deviation  
484 of intensity. The specific adjustment method varied depending on the image quality, ensuring  
485 optimal visibility of Hrp38 condensate speckles. Then, background subtraction was performed  
486 with a rolling ball radius of 120 pixels. The conversion to a binary image involved max entropy  
487 thresholding, although the minimum thresholding method was employed for some images to  
488 accommodate diverse lighting conditions. The thresholded images were saved as TIFF files for  
489 use in the TrackIt tracking software. In total, 15 male control movies, 28 male CLAMP del PrLD  
490 mutant movies, 15 female control movies, and 38 female CLAMP del PrLD movies were utilized  
491 in subsequent analyses.

492



493 For tracking analysis, TIFF movies from each experimental condition were loaded into TrackIt<sup>34</sup>,  
494 a program for tracking and analyzing single-molecule experiments developed by the Gebhardt  
495 lab. The analysis was conducted using MATLAB on a Windows 10 PC, utilizing default settings  
496 with specific parameter adjustments: threshold (4), tracking radius (8), minimum track length  
497 (2), one gap frame allowed, and minimum track length before the gap (3). Each experimental  
498 condition was analyzed using TrackIt's MATLAB-based data visualization tool, with settings  
499 further edited for formatting in a MATLAB script.

500  
501 Bound fraction analysis was done according to TrackIt package<sup>34</sup>. TrackIt provided information  
502 on tracked events, including long, short, linked, and nonlinked events. The calculation of bound  
503 fractions by TrackIt involved determining the ratio of the sum of short and long events to non-  
504 linked events. Movie-wise means were plotted, and the mean across all movies and the pooled  
505 fraction (sum over all movies for each type of event) were plotted to ensure that one movie did  
506 not unduly influence the mean.

507

### 508 **Competing Interest Statement**

509 The authors declare no conflicting interests.

510

### 511 **Acknowledgments**

512 This work was supported by R35GM126994 to E.N.L. from NIH and by National Science  
513 Foundation (Directorate for Biological Sciences) 1845734 to N.L.F. A.M.C is funded by the NSF  
514 Graduate Research Fellowship and CCMB, Brown University. We thank Bloomington stock  
515 center for fly lines. We thank Steve Henikoff for pAMNase protein and spike-in DNA for Cut  
516 and Run.

517

### 518 **Author Contributions**

519 **M.R.**, **N. L. F** and **E.N.L.** planned experiments, analyzed results and wrote the manuscript. **J.Z**  
520 did all protein purifications, the NMR and phase separation assays for CLAMP. **M.R.** carried out  
521 the experimental work and collected data for Cut and Run, iCLIP, FRAP, Live imaging, RNA-  
522 EMSA, RNA isolation for RNA-sequencing, and generated fly mutants. **P.M** analyzed third  
523 instar larval RNA-seq data using time2splice pipeline to identify CLAMP dependent splicing

524 events, integrated CLAMP iCLIP data with CLAMP CUT&RUN in cell lines and performed the  
525 splicing assay for *hrp38*. **S.V** analyzed the live imaging data sets. **R.V** performed the co-LLPS  
526 assay with Hrp38 and CLAMP. **J.S** cloned CLAMP1-300 and CLAMP1-300del PrLD clones  
527 and helped with RNA-EMSA assays. **A.H** analyzed the iCLIP-seq data. **A.M.C** analyzed  
528 CUT&RUN data. **S.H.W** helped with NMR analysis. **V.J.** and **N.W.** helped with CLAMP  
529 Protein Expression and Purification. **A.E.C** and **R.P** helped with the protein and NMR assays.

## References

1. Boumpas, P., Merabet, S. & Carnesecchi, J. Integrating transcription and splicing into cell fate: transcription factors on the block. *Wiley Interdisciplinary Reviews: RNA***14**, e1752 (2023).
2. Han, H. et al. Multilayered control of alternative splicing regulatory networks by transcription factors. *Molecular cell***65**, 539-553. e7 (2017).
3. Saulnier, O. et al. ERG transcription factors have a splicing regulatory function involving RBFOX2 that is altered in the EWS-FLI1 oncogenic fusion. *Nucleic Acids Research***49**, 5038-5056 (2021).
4. Jabre, I. et al. Does co-transcriptional regulation of alternative splicing mediate plant stress responses? *Nucleic Acids Research***47**, 2716-2726 (2019).
5. Oksuz, O. et al. Transcription factors interact with RNA to regulate genes. *Molecular Cell***83**, 2449-2463. e13 (2023).
6. He, C. et al. High-resolution mapping of RNA-binding regions in the nuclear proteome of embryonic stem cells. *Molecular cell***64**, 416-430 (2016).
7. Cassiday, L.A. & Maher III, L.J. Having it both ways: transcription factors that bind DNA and RNA. *Nucleic acids research***30**, 4118-4126 (2002).
8. Göös, H. et al. Human transcription factor protein interaction networks. *Nature communications***13**, 766 (2022).
9. Urban, J.A., Urban, J.M., Kuzu, G. & Larschan, E.N. The Drosophila CLAMP protein associates with diverse proteins on chromatin. *PLoS one***12**, e0189772 (2017).
10. Kuzu, G. et al. Expansion of GA dinucleotide repeats increases the density of CLAMP binding sites on the X-chromosome to promote Drosophila dosage compensation. *PLoS genetics***12**, e1006120 (2016).
11. Kaye, E.G. et al. Differential occupancy of two GA-binding proteins promotes targeting of the drosophila dosage compensation complex to the male X chromosome. *Cell reports***22**, 3227-3239 (2018).
12. Soruco, M.M. et al. The CLAMP protein links the MSL complex to the X chromosome during Drosophila dosage compensation. *Genes & development***27**, 1551-1556 (2013).
13. Albig, C. et al. Factor cooperation for chromosome discrimination in Drosophila. *Nucleic acids research***47**, 1706-1724 (2019).
14. Ray, M. et al. Sex-specific splicing occurs genome-wide during early Drosophila embryogenesis. *eLife***12**, e87865 (2023).
15. Straub, T., Zabel, A., Gilfillan, G.D., Feller, C. & Becker, P.B. Different chromatin interfaces of the Drosophila dosage compensation complex revealed by high-shear ChIP-seq. *Genome research***23**, 473-485 (2013).
16. Alekseyenko, A.A. et al. A sequence motif within chromatin entry sites directs MSL establishment on the Drosophila X chromosome. *Cell***134**, 599-609 (2008).

17. March, Z.M., King, O.D. & Shorter, J. Prion-like domains as epigenetic regulators, scaffolds for subcellular organization, and drivers of neurodegenerative disease. *Brain research***1647**, 9-18 (2016).
18. Harrison, A.F. & Shorter, J. RNA-binding proteins with prion-like domains in health and disease. *Biochemical Journal***474**, 1417-1438 (2017).
19. Gotor, N.L. et al. RNA-binding and prion domains: the Yin and Yang of phase separation. *Nucleic acids research***48**, 9491-9504 (2020).
20. Wang, Y. et al. A prion-like domain in transcription factor EBF1 promotes phase separation and enables B cell programming of progenitor chromatin. *Immunity***53**, 1151-1167. e6 (2020).
21. Yang, J. et al. A prion-like domain of TFEB mediates the co-aggregation of TFEB and mHTT. *Autophagy***19**, 544-550 (2023).
22. Brodsky, S., Jana, T. & Barkai, N. Order through disorder: The role of intrinsically disordered regions in transcription factor binding specificity. *Current opinion in structural biology***71**, 110-115 (2021).
23. Eggers, N., Gkoutromichos, F., Krause, S., Campos-Sparr, A. & Becker, P.B. Physical interaction between MSL2 and CLAMP assures direct cooperativity and prevents competition at composite binding sites. *Nucleic Acids Research***51**, 9039-9054 (2023).
24. Ilik, I.A. et al. A mutually exclusive stem-loop arrangement in roX2 RNA is essential for X-chromosome regulation in *Drosophila*. *Genes & development***31**, 1973-1987 (2017).
25. Duan, J. et al. CLAMP and Zelda function together to promote *Drosophila* zygotic genome activation. *Elife***10**, e69937 (2021).
26. Li, S. et al. Genetic interaction of hnRNPA2B1 and DNAJB6 in a *Drosophila* model of multisystem proteinopathy. *Human molecular genetics***25**, 936-950 (2016).
27. Blanchette, M. et al. Genome-wide analysis of alternative pre-mRNA splicing and RNA-binding specificities of the *Drosophila* hnRNP A/B family members. *Molecular cell***33**, 438-449 (2009).
28. Borah, S., Wong, A.C. & Steitz, J.A. *Drosophila* hnRNP A1 homologs Hrp36/Hrp38 enhance U2-type versus U12-type splicing to regulate alternative splicing of the prospero twintron. *Proceedings of the National Academy of Sciences***106**, 2577-2582 (2009).
29. Herold, N. et al. Conservation of the protein composition and electron microscopy structure of *Drosophila melanogaster* and human spliceosomal complexes. *Molecular and cellular biology* (2009).
30. Singh, A.K. & Lakhotia, S.C. Dynamics of hnRNPs and omega speckles in normal and heat shocked live cell nuclei of *Drosophila melanogaster*. *Chromosoma***124**, 367-383 (2015).
31. Mann, R. & Notani, D. Transcription factor condensates and signaling driven transcription. *Nucleus***14**, 2205758 (2023).
32. Hennig, S. et al. Prion-like domains in RNA binding proteins are essential for building subnuclear paraspeckles. *Journal of Cell Biology***210**, 529-539 (2015).
33. Guo, Y.E. et al. Pol II phosphorylation regulates a switch between transcriptional and splicing condensates. *Nature***572**, 543-548 (2019).

34. Kuhn, T., Hettich, J., Davtyan, R. & Gebhardt, J.C.M. Single molecule tracking and analysis framework including theory-predicted parameter settings. *Scientific Reports***11**, 9465 (2021).
35. Forman-Kay, J.D., Ditlev, J.A., Nosella, M.L. & Lee, H.O. What are the distinguishing features and size requirements of biomolecular condensates and their implications for RNA-containing condensates? *RNA***28**, 36-47 (2022).
36. Deshaies, J.-E. et al. TDP-43 regulates the alternative splicing of hnRNP A1 to yield an aggregation-prone variant in amyotrophic lateral sclerosis. *Brain***141**, 1320-1333 (2018).
37. Shin, Y. et al. Spatiotemporal control of intracellular phase transitions using light-activated optoDroplets. *Cell***168**, 159-171. e14 (2017).
38. Shin, Y. & Brangwynne, C.P. Liquid phase condensation in cell physiology and disease. *Science***357**, eaaf4382 (2017).
39. Gratz, S.J., Rubinstein, C.D., Harrison, M.M., Wildonger, J. & O'Connor-Giles, K.M. CRISPR-Cas9 genome editing in Drosophila. *Current protocols in molecular biology***111**, 31.2. 1-31.2. 20 (2015).
40. Skene, P.J., Henikoff, J.G. & Henikoff, S. Targeted in situ genome-wide profiling with high efficiency for low cell numbers. *Nature protocols***13**, 1006-1019 (2018).
41. Huppertz, I. et al. iCLIP: protein–RNA interactions at nucleotide resolution. *Methods***65**, 274-287 (2014).
42. Heyl, F., Maticzka, D., Uhl, M. & Backofen, R. Galaxy CLIP-Explorer: a web server for CLIP-Seq data analysis. *GigaScience***9**, giaa108 (2020).
43. Andrews, S. FastQC: a quality control tool for high throughput sequence data. 2010. (2017).
44. Langmead, B. & Salzberg, S.L. Fast gapped-read alignment with Bowtie 2. *Nature methods***9**, 357-359 (2012).
45. Kim, D., Paggi, J.M., Park, C., Bennett, C. & Salzberg, S.L. Graph-based genome alignment and genotyping with HISAT2 and HISAT-genotype. *Nature biotechnology***37**, 907-915 (2019).
46. Li, H. & Durbin, R. Fast and accurate short read alignment with Burrows–Wheeler transform. *bioinformatics***25**, 1754-1760 (2009).
47. Zhang, Y. et al. Model-based analysis of ChIP-Seq (MACS). *Genome biology***9**, 1-9 (2008).
48. Bailey, T.L., Johnson, J., Grant, C.E. & Noble, W.S. The MEME suite. *Nucleic acids research***43**, W39-W49 (2015).
49. Uyar, B. et al. RCAS: an RNA centric annotation system for transcriptome-wide regions of interest. *Nucleic acids research***45**, e91-e91 (2017).
50. Delaglio, F. et al. NMRPipe: a multidimensional spectral processing system based on UNIX pipes. *Journal of biomolecular NMR***6**, 277-293 (1995).
51. Skinner, S.P. et al. CcpNmr AnalysisAssign: a flexible platform for integrated NMR analysis. *Journal of biomolecular NMR***66**, 111-124 (2016).

## Figure legends

Figure. 1. **The PrLD domain is important for CLAMP-RNA interaction and phase separation.** **A.** Venn diagrams showing the distribution of CLAMP RNA targets between male and female cell types and between chromatin and nucleoplasm fractions (**four replicates** for each category performed except **three replicates** for the Kc nucleoplasm fraction). **B.** Venn diagrams showing the distribution of CLAMP snRNA targets between male and female cell types in chromatin and nucleoplasm fractions. The corresponding bar plots denote the total number of snRNAs CLAMP binds to in respective fractions and cell types. **C.** Frequency distribution of CLAMP RNA binding peaks (iCLIP data, **four replicates**) plotted over a region ( $\pm 1$ kb across the middle of the DNA peak) spanning CLAMP DNA binding peaks (black line, CUT&RUN data, **three replicates** for males, **two replicates** for females). Complete overlaps are denoted by magenta, non-overlaps in yellow, partial overlaps in red (near the starting boundary of DNA peaks), and blue (near the ending of DNA peaks). **D-E.** Bar plots (**D**) and pie-chart (**E**) show the distribution of the number of CLAMP-RNA peaks that overlap with CLAMP-DNA peaks or are within  $\pm 1$ kb region of CLAMP-DNA peaks (proximal peaks, PXP). Overlapping peaks are sub-categorized into complete RNA peaks overlapping with DNA peaks (CRO), overlapping RNA peaks with DNA peak front (5' end, ORF), and overlapping RNA peaks with DNA peak 3' end (ORE). **F.** The  $^1\text{H}^{15}\text{N}$  HSQC spectrum of 1-300 CLAMP at 50  $\mu\text{M}$  visualizes the largely disordered nature of the protein. Dispersed resonances in the region from 7.9 – 7.0 ppm in the  $^1\text{H}$  and 115-122 ppm in the  $^{15}\text{N}$  likely arise from the folded zinc finger **G.** Diagram of full-length CLAMP depicting the location of the PrLD (residues 154-290) and other important features (**top**). Regions of full-length CLAMP (**below**) are predicted to resemble yeast prion protein (enriched in polar residues with little to no aliphatic or charged residues). **I.**  $^1\text{H}^{15}\text{N}$  HSQC spectra of CLAMP PrLD at 20 $\mu\text{M}$  with (red) and without (blue) torula yeast RNA. **J.** RNA Electrophoretic mobility shift assay (RNA-EMSA) showing the binding of increasing amounts of MBP fusion CLAMP-Full length and CLAMP PrLD domain deleted protein to *rox2* RNA biotinylated probes (100 nM). Concentrations ( $\mu\text{M}$ ) of CLAMP protein increase from left to right. **K.** RNA-EMSA showing difference in binding of full-length (FL) CLAMP (fused to MBP) to *rox2-RNA* probe with (411nt) and without (342nt) stem-loop and CLAMP-*rox2* RNA (iCLIP

data) binding region. Concentrations ( $\mu\text{M}$ ) of CLAMP FL increase from left to right. **L.** RNA-EMSA showing difference in binding of MBP-fusions of full-length (FL) CLAMP and CLAMP PrLD domain deleted protein to *rox2-RNA* probe without (399nt) CLAMP-*rox2* RNA (iCLIP) binding region. Concentrations ( $\mu\text{M}$ ) of CLAMP FL and CLAMP $\Delta$  PrLD increase from left to right.

**Figure. 2. The CLAMP PrLD domain regulates hnRNPA2 homolog Hrp38 biomolecular condensate dynamics.** **A.** CLAMP-DNA binding (Cut&Run data) and CLAMP-RNA binding in chromatin fraction (iCLIP data) peaks visualized in the IGV genome browser at the *hrp38* gene location. **B.** Schematic of *hrp38* transcript showing CLAMP binding at exon1 and alternative splicing of intron AF:r6:3R:28600568:28600718:+ in *clamp*<sup>delPrLD</sup>/*clamp*<sup>delPrLD+6Q</sup> mutant male. **C-D.** RNA EMSA mobility shift showing a difference in the efficiency of CLAMP full-length protein-*hrp38* exon1 and exon2 binding (**C**) and that of CLAMP-PrLD domain deleted and CLAMP full-length protein with *hrp38* exon1 (**D**). CLAMP<sup>delPrLD</sup> and CLAMP<sup>WT</sup>-Full length MBP fusions were used at increasing concentrations of 0, 3.1, 6.2, and 12.5  $\mu\text{M}$  with 50 nM biotinylated RNA probes. **E-F.** Bar plot showing the change in levels of intron AF:r6:3R:28600568:28600718:+ spliced isoforms resulting from alternative splicing events in male and female L3 larvae under control *clamp*<sup>WT</sup> (green) and *clamp*<sup>delPrLD</sup>/*clamp*<sup>delPrLD+6Q</sup> (orange) conditions. The isoform transcript levels are normalized by the levels of *gapdh* housekeeping gene transcript. p-values (paired student's t-test) for groups showing significant differences are noted at the top of the line connecting the compared groups (**three replicates** for each category). The corresponding agarose electrophoretic gel image is shown in **F**. **G.** DIC micrograph of CLAMP 1-300 with or without PrLD domain (100  $\mu\text{M}$ ) at 150 mM salt concentration with 5% PEG. **H.** Single plane confocal images showing the co-LLPS of Alexa Fluor 488 maleimide dye-labeled Hrp38 with a single cysteine added for labeling (green) and Alexa Fluor 555 maleimide dye-labeled 1-300 CLAMP (red) under phase separating conditions for Hrp38. **I.** Bar plots showing the percentage of Hrp38-GFP in the immobile phase (FRAP analysis) in male and female L3 larvae under control *clamp*<sup>WT</sup> (green) and *clamp*<sup>delPrLD</sup>/*clamp*<sup>delPrLD+6Q</sup> (orange) conditions. p-values (paired student's t-test) for groups showing significant differences marked by asterisk are noted at the top of the line connecting the compared groups—**n**=Number of Malpighian tubule principal cell nuclei, **N**= Number of

individuals. **J.** Mean bound fraction of Hrp38GFP speckles (Number of Hrp38GFP speckles bound, i.e., immobile track lengths/the total number of Hrp38GFP speckles with all types of track lengths over a fixed time-period) in salivary gland nuclei expressing Hrp38-GFP in male and female *clamp*<sup>WT</sup> and *clamp*<sup>delPrLD</sup>/*clamp*<sup>delPrLD+6Q</sup> individuals. Each dot represents each individual (movie), and ‘n’ denotes the number of Hrp38 speckles identified in each category. **K.** Confocal image of a single plane of salivary gland nuclei expressing Hrp83-GFP in *clamp*<sup>WT</sup> (green) and *clamp*<sup>delPrLD</sup>/*clamp*<sup>delPrLD+6Q</sup> (orange) conditions.

**Fig S1 CLAMP binds to both DNA and RNA at specific gene loci A-C.** CLAMP-DNA binding (Cut & Run data) and CLAMP-RNA binding in chromatin fraction (iCLIP data) peaks visualized in the IGV genome browser at the *mrj*, *sf3b3* and *sqd* gene location. Arrow in **A** denotes CLAMP RNA peak completely overlapping with CLAMP DNA peak (CRO) and in **B** denotes CLAMP RNA peaks overlapping with 5’ and 3’ ends of DNA peaks (ORF and ORE). RNA peaks in **C** show CLAMP-RNA peaks proximal to DNA peaks (PXP)

**Fig S2 *rox2* RNA probes for CLAMP-*rox2* binding assays** *rox2* gene region showing putative CLAMP binding site (iCLIP data), stem loop region and *rox2* RNA probe used for CLAMP-*rox2* RNA-EMSA assay.



## Table legends

**Table 1a:** CLAMP RNA targets identified in the nuclear fractions of male (S2) and female (Kc) cells.

**Table 1b:** List of genes and genomic locations where CLAMP RNA peak completely overlapping with CLAMP DNA peak (CRO), CLAMP RNA peaks overlapping with 5' and 3' ends of DNA peaks (ORF and ORE) and CLAMP RNA peaks are proximal to DNA peaks (PXP) in male (S2) and female (Kc) cells.

**Table 2a:** List of all CLAMP PrLD dependent differentially spliced genes in *Drosophila* female third instar larvae (L3).

**Table 2b:** List of all CLAMP PrLD dependent differentially spliced genes in *Drosophila* male third instar larvae (L3).

**Table 3:** List of CLAMP PrLD dependent male and female specifically spliced genes whose RNA isoforms are direct targets of CLAMP protein.

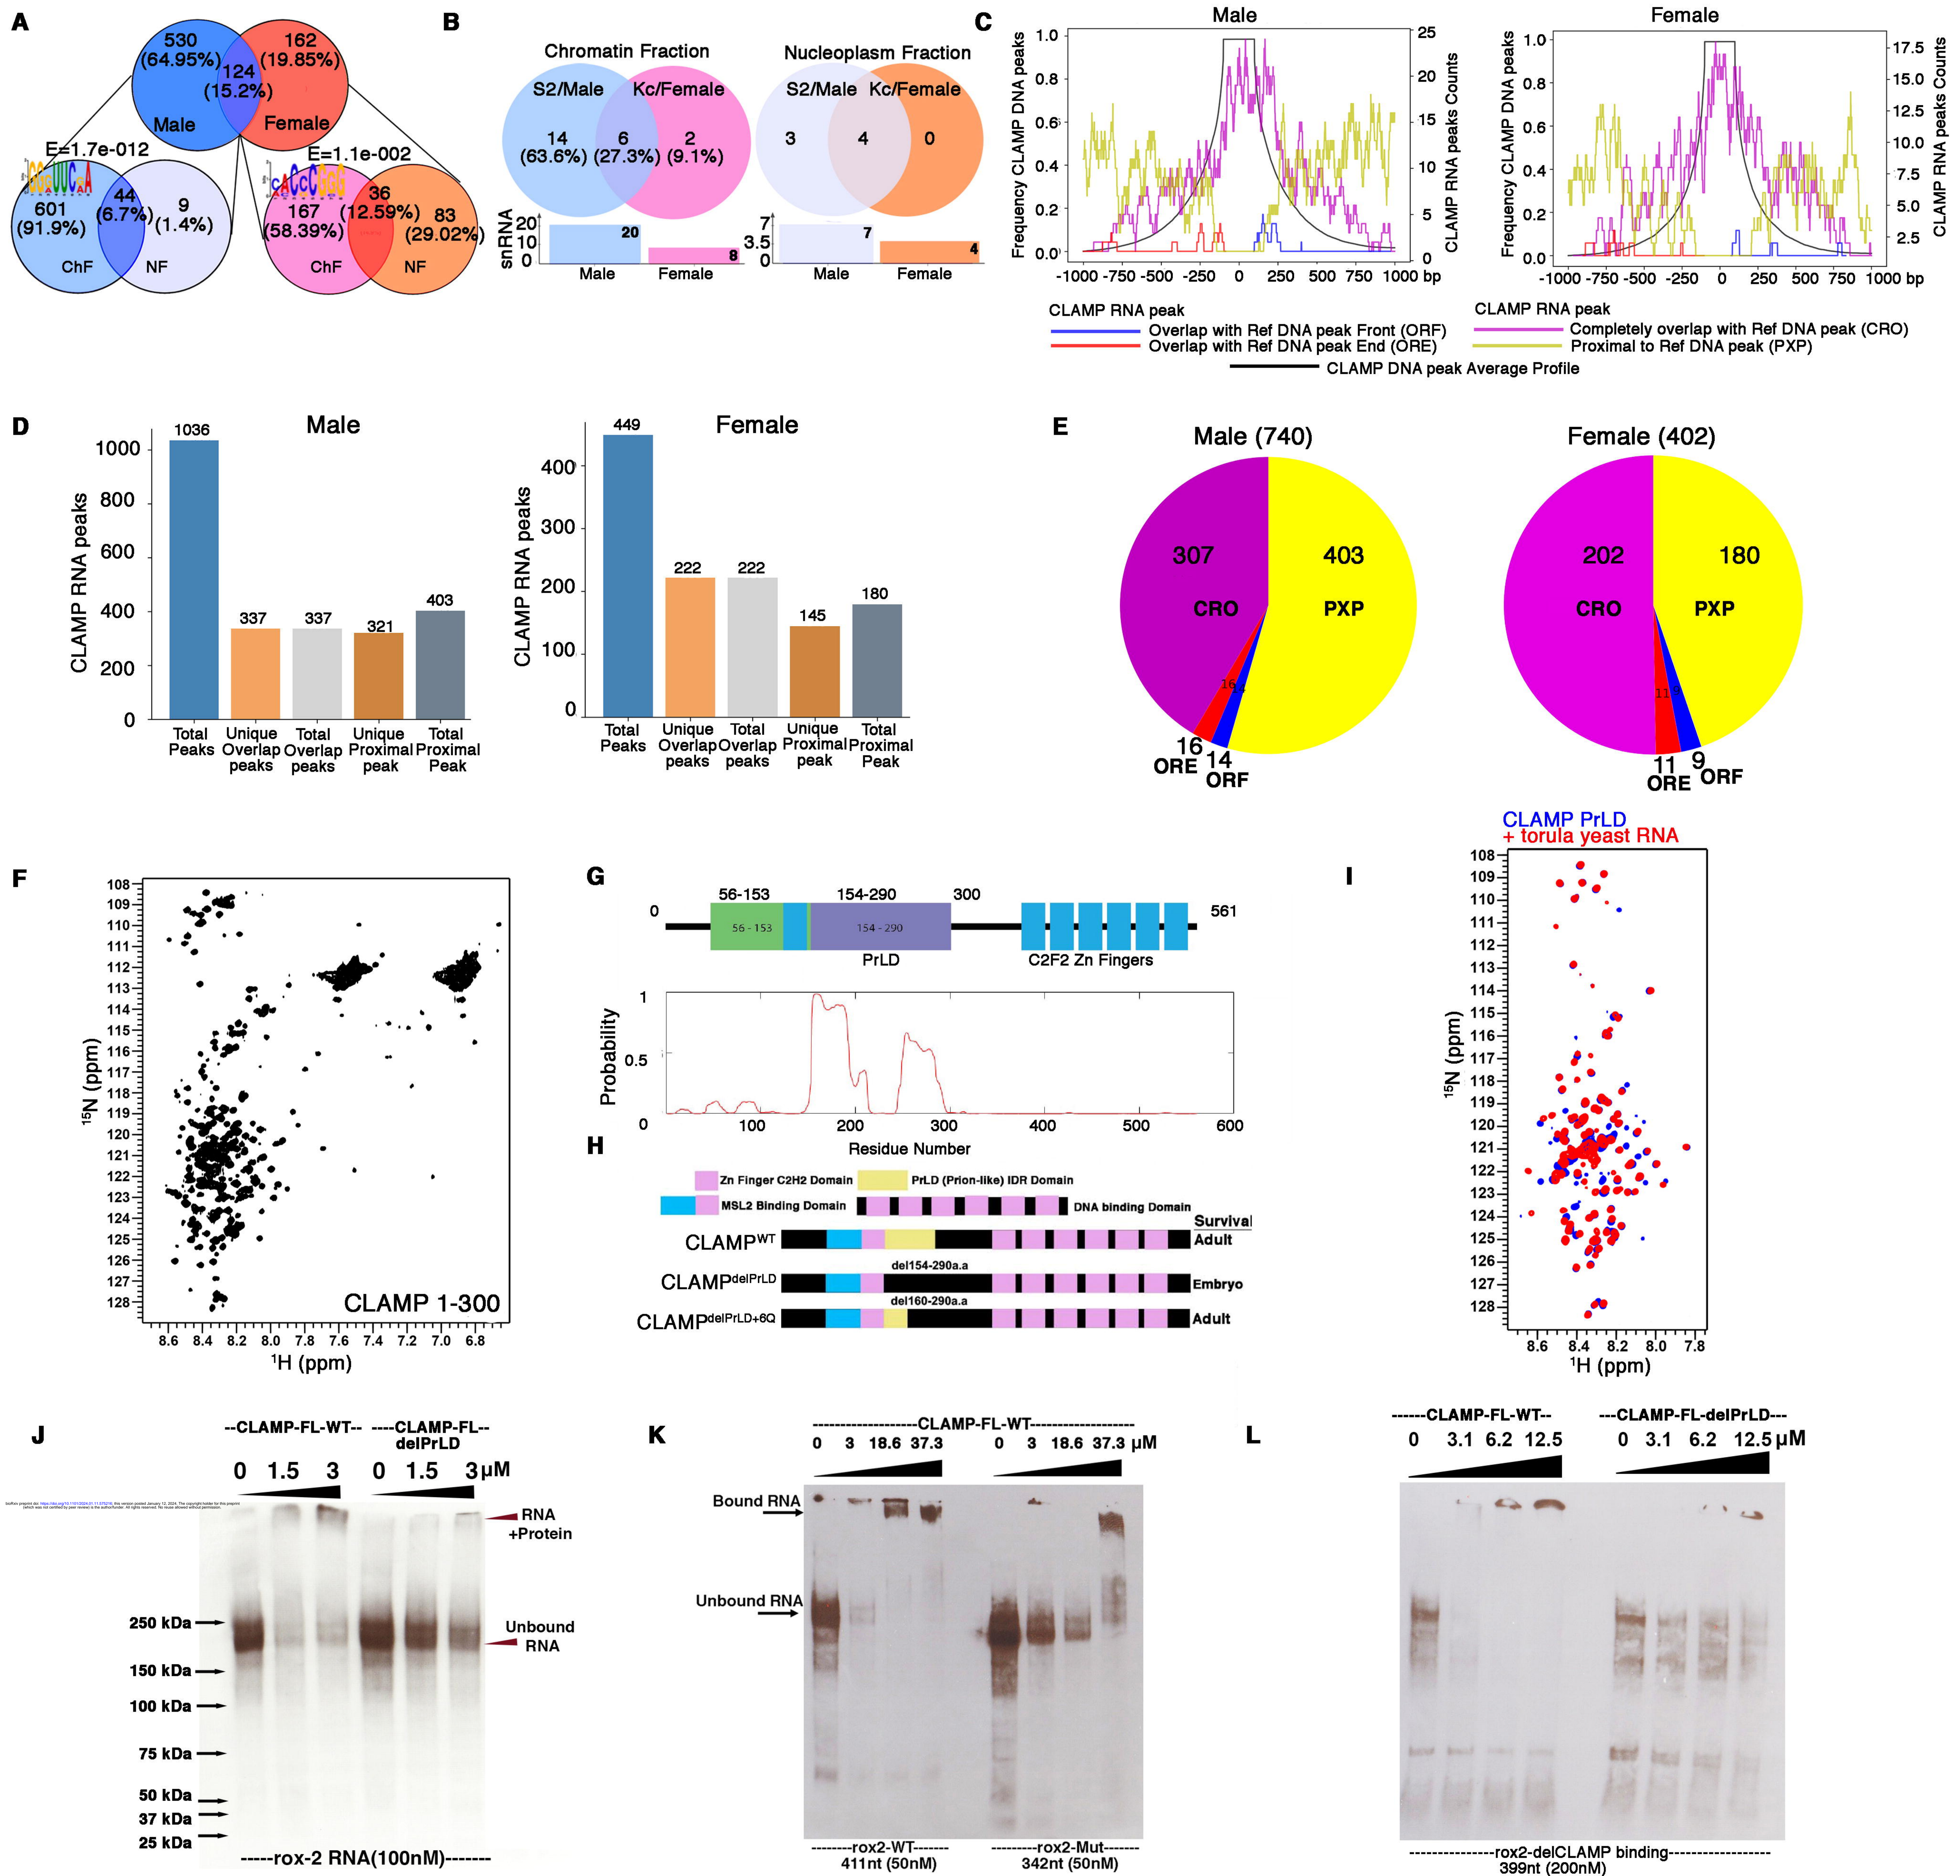

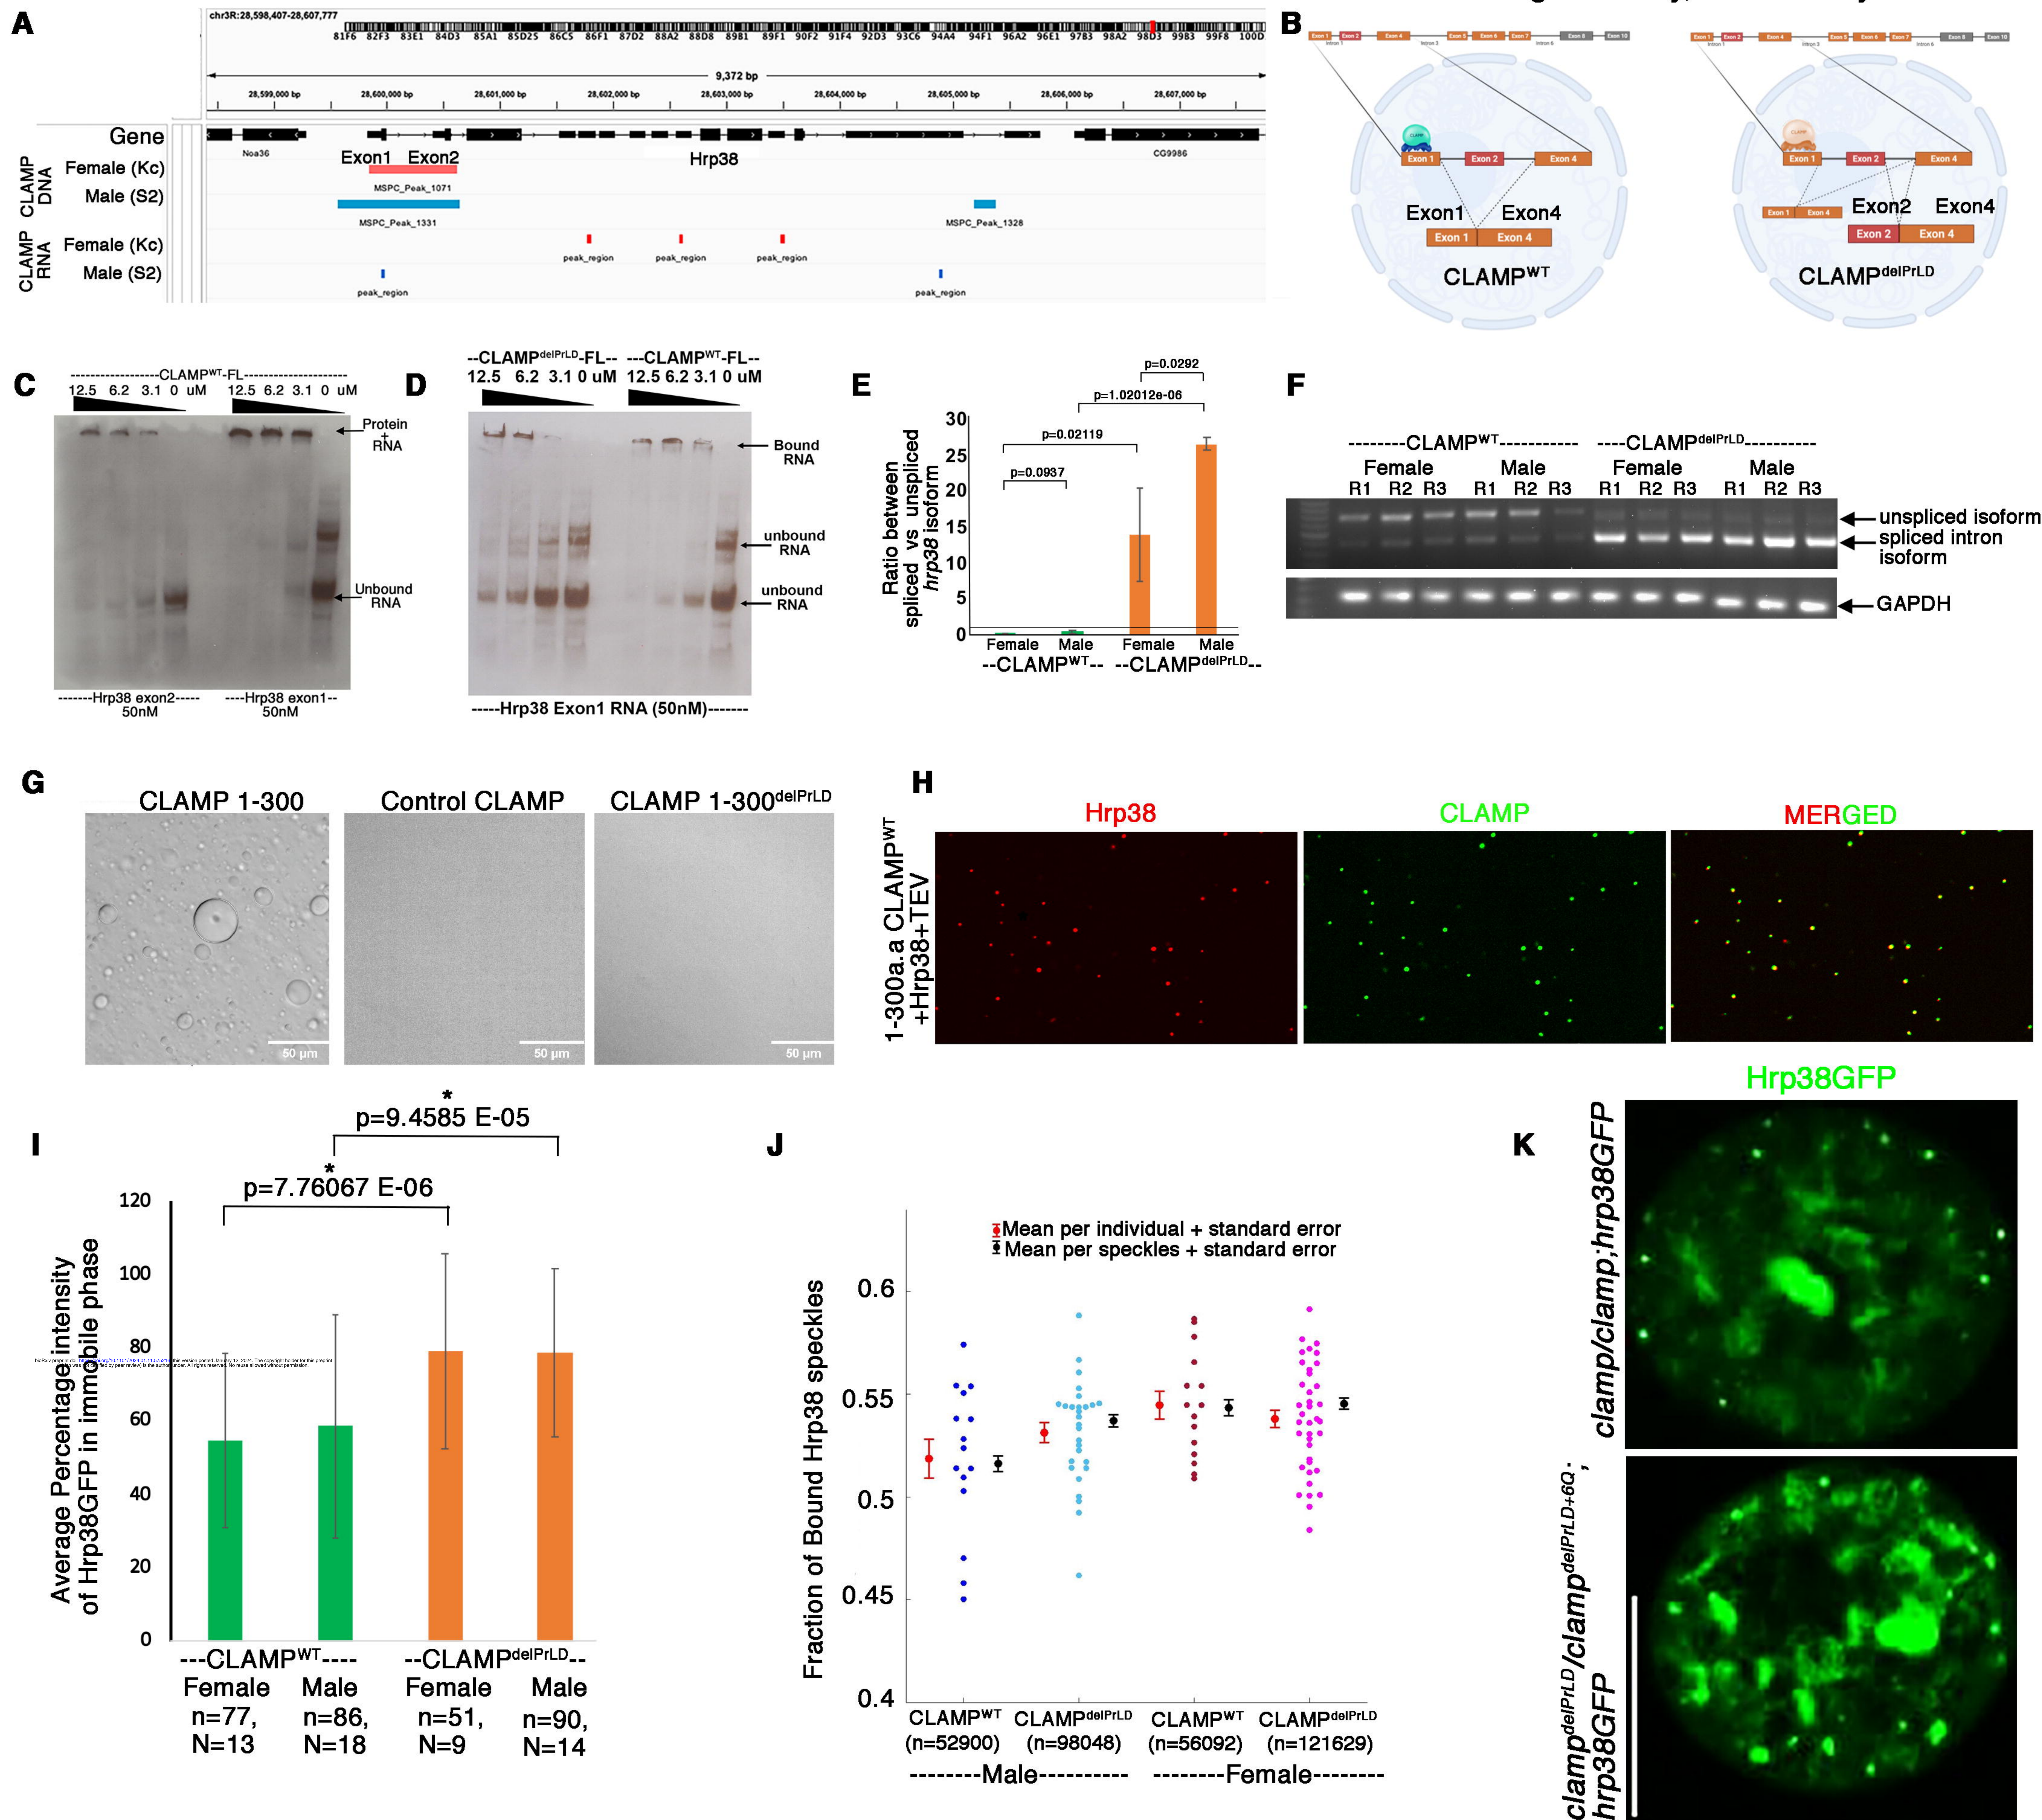

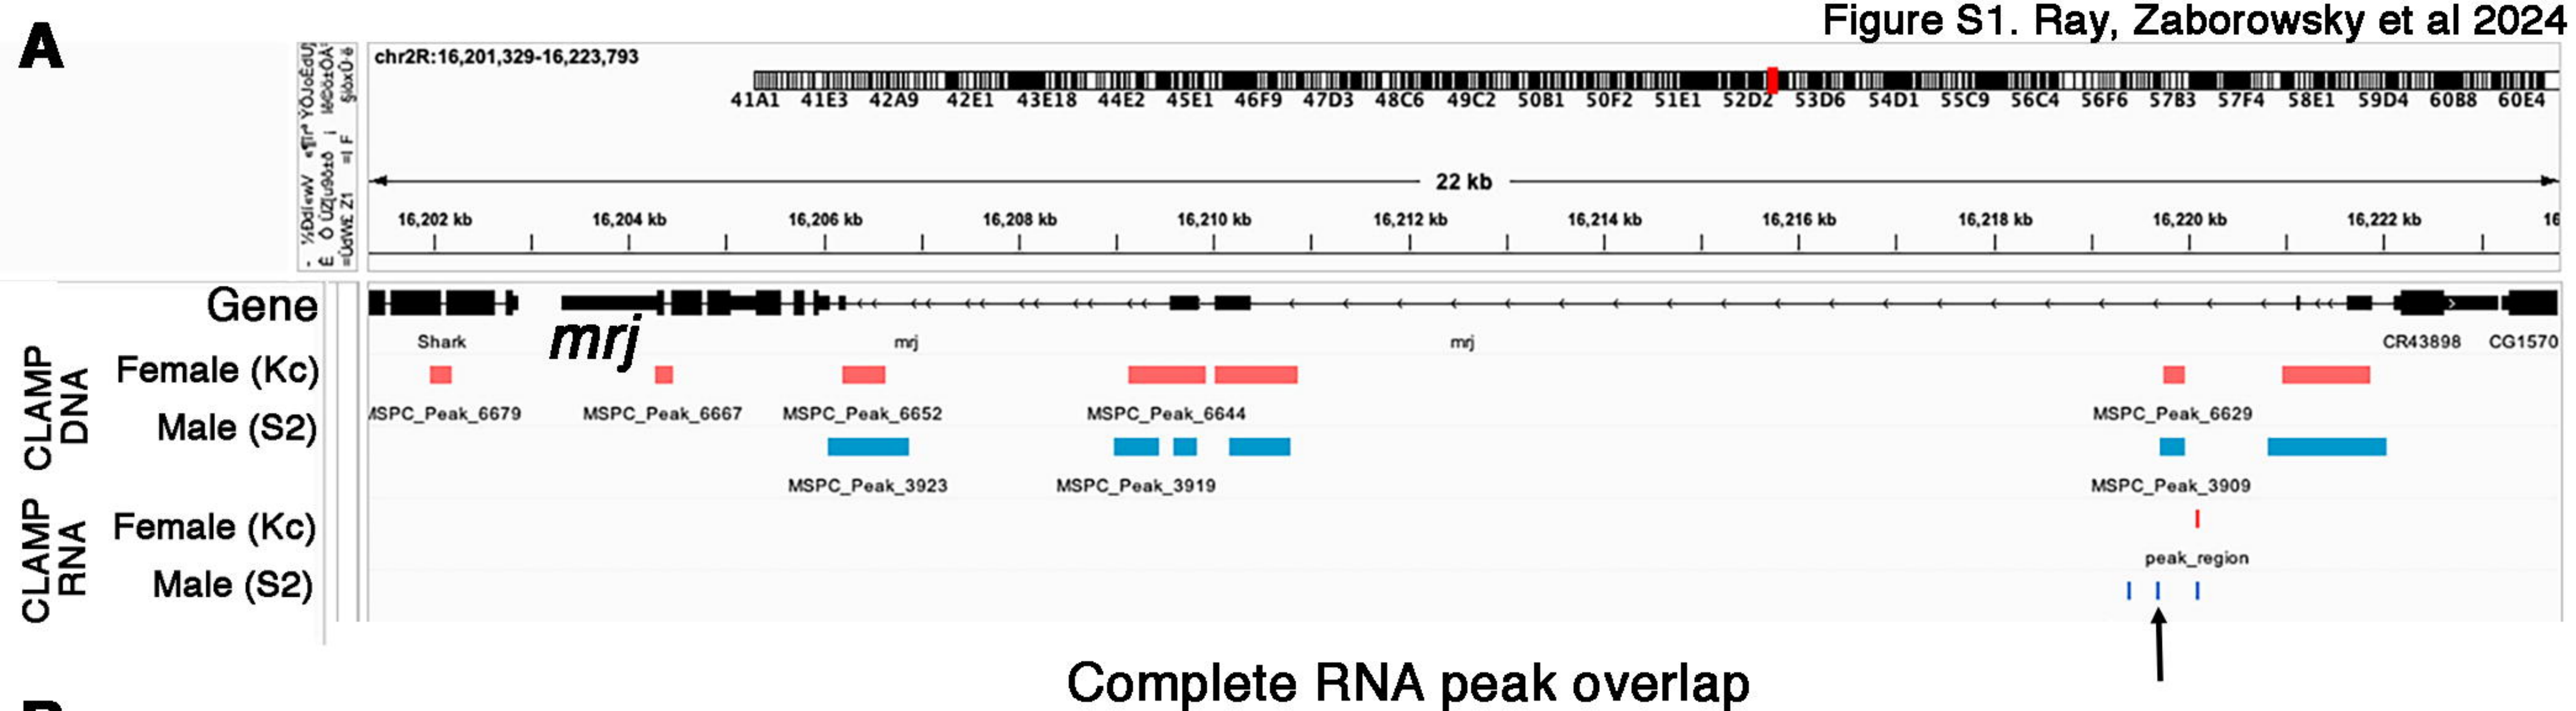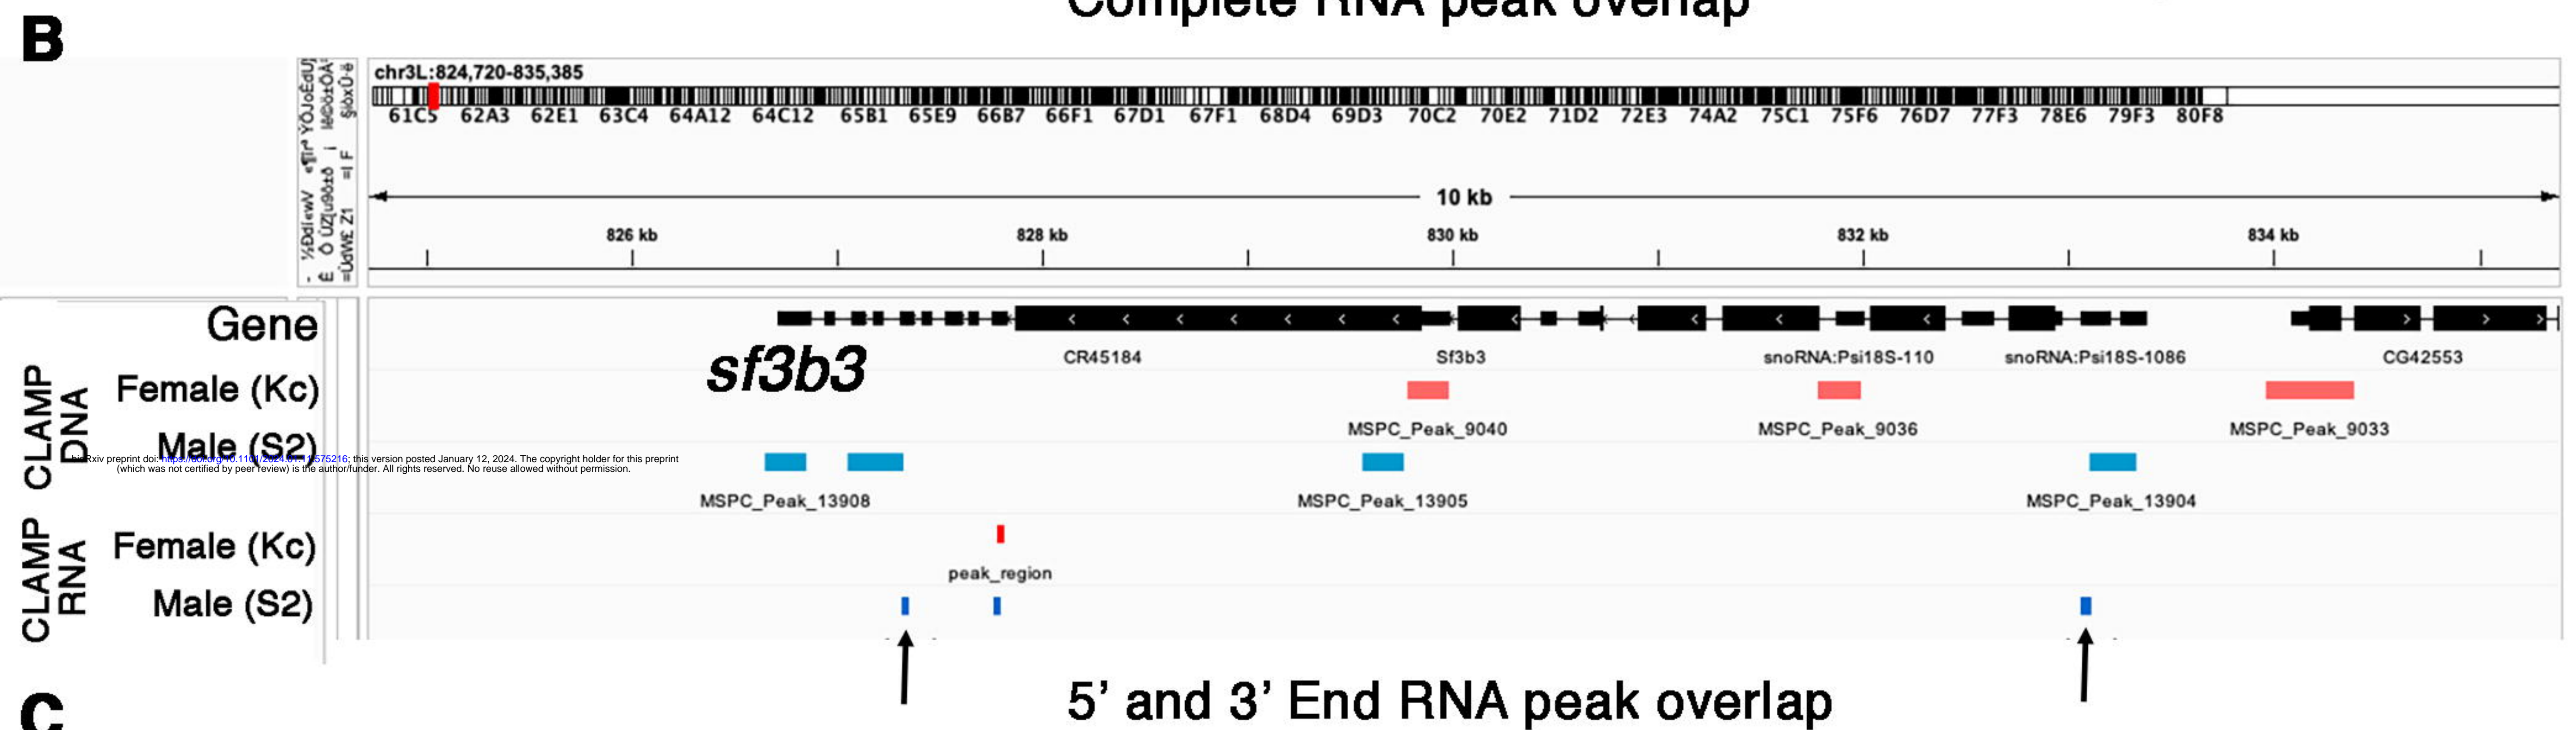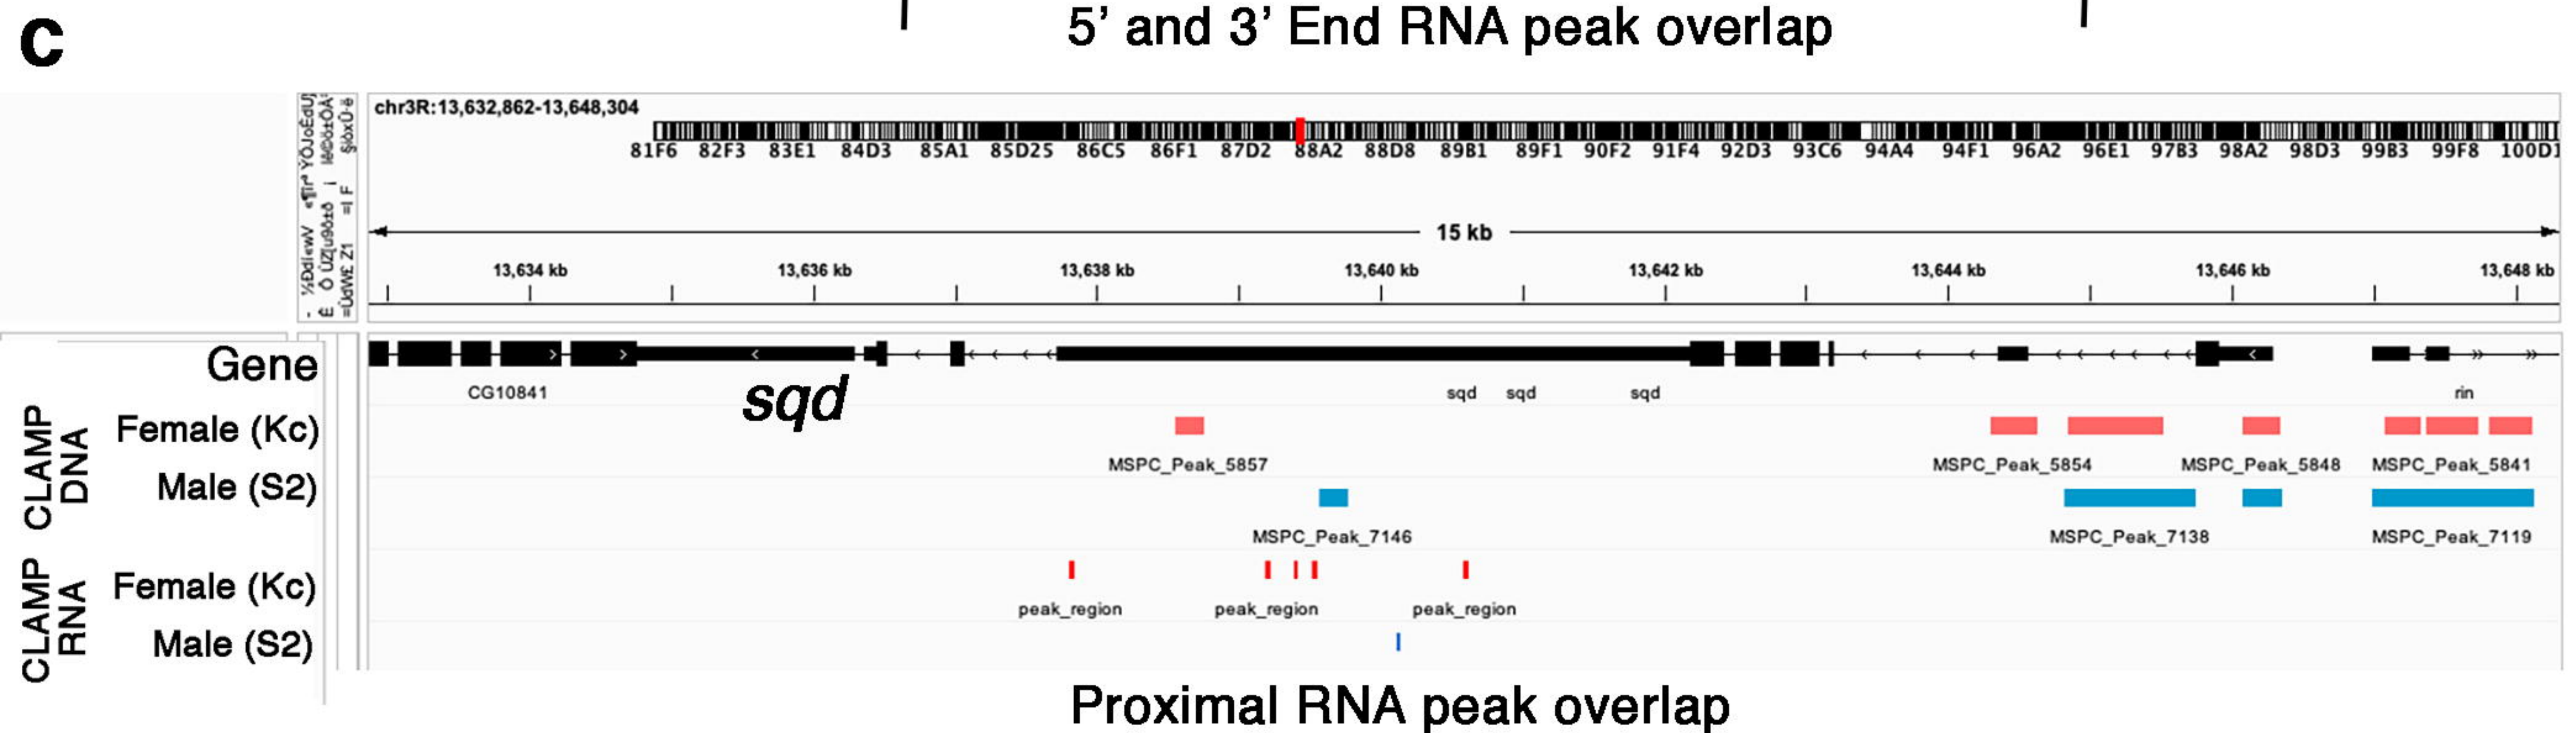

*rox2*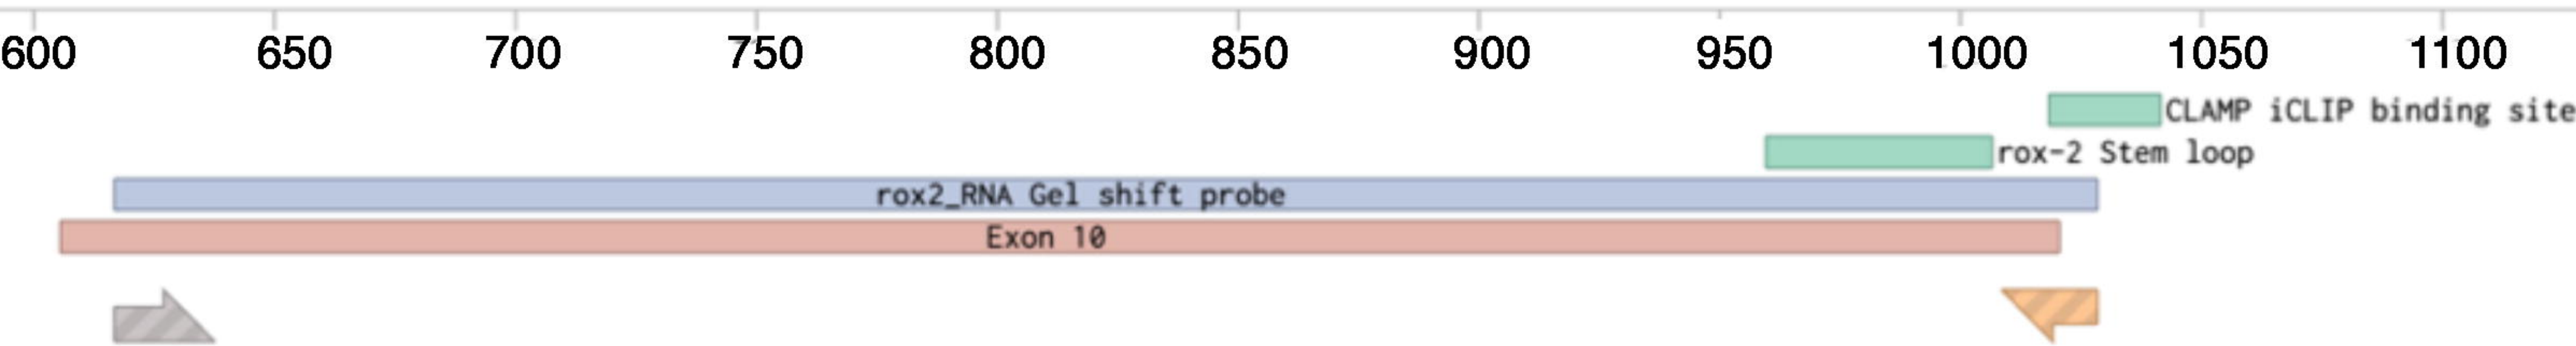

TATACAATATAACAATATAACAATATGCAATACAATACAATACAAGACAAAAAATGTGTCTTGGAACGCAACATTGTACAAGTCGCAATGCAAACCTGAAGTCTTAAAA  
 ATATGTTATATGTTATATGTTATACGTTATGTTATGTTATGTTCTGTTTTTTTACACAGAACCTTGCGTTGTAACATGTTTCAGCGTTACGTTTGACTTCAGAAATTTT

bioRxiv preprint doi: <https://doi.org/10.1101/2024.01.11.575216>; this version posted January 12, 2024. The copyright holder for this preprint (which was not certified by peer review) is the author/funder. All rights reserved. No reuse allowed without permission.

rox2\_RNA Gel shift probe

Exon 10

860 870 880 890 900 910 920 930 940 950 960

GACGTGTAATGTTGCAAATTAAGCAAATATATATGCATATATGGGTAACGTTTTTACGCGCCTTAACCAGTCAAATACAAAATAAATTGGTAAATTTTCATATAAC  
 CTGCACATTTTACAACGTTTAATTCGTTTATATATACGTATATACCCATTGCAAATGCGCGGAATTGGTCAGTTTTATGTTTTATTTAACCATTTAAAGTATATTG

Stem Loop region

CCATTGCAAATGCGCGGAA

CLAMP iCLIP  
binding site

*rox2* RNA probe

CLAMP iC...ng site

rox2\_RNA Gel shift probe

Exon 10

970 980 990 1000 1010 1020 1030 1040 1050 1060 1070
